# 1 Long-read sequencing reveals the RNA isoform repertoire 2 of neuropsychiatric risk genes in human brain

3

4 Ricardo De Paoli-Iseppi<sup>1\*</sup>, Shweta Joshi<sup>1</sup>, Josie Gleeson<sup>1</sup>, Yair David Joseph Prawer<sup>1</sup>, Yupei Yu<sup>1</sup>, Ria Agarwal<sup>1</sup>,  
5 Anran Li<sup>1</sup>, Anthea Hull<sup>1</sup>, Eloise Marie Whitehead<sup>1</sup>, Yoonji Seo<sup>1</sup>, Rhea Kujawa<sup>1</sup>, Raphael Chang<sup>1</sup>, Mriga Dutt<sup>1</sup>,  
6 Catriona McLean<sup>2,3</sup>, Benjamin Leo Parker<sup>1</sup>, Michael Ben Clark<sup>1\*</sup>

7 <sup>1</sup>Department of Anatomy and Physiology, The University of Melbourne, Parkville, VIC, Australia

8 <sup>2</sup>Department of Anatomical Pathology, Alfred Health, Melbourne, Victoria, Australia

9 <sup>3</sup>Victorian Brain Bank, The Florey, Parkville, Victoria, Australia

10 \*Corresponding authors

## 11 Abstract

12 Neuropsychiatric disorders are highly complex conditions and the risk of developing a disorder has  
13 been tied to hundreds of genomic variants that alter the expression and/or products (isoforms) made  
14 by risk genes. However, how these genes contribute to disease risk and onset through altered  
15 expression and RNA splicing is not well understood. Here we show our current understanding of gene  
16 isoforms is far from complete and reveal the precise splicing profiles of neuropsychiatric disorder risk  
17 genes. Combining our new bioinformatic pipeline IsoLamp with nanopore long-read amplicon  
18 sequencing, we deeply profiled the RNA isoform repertoire of 31 high-confidence neuropsychiatric  
19 disorder risk genes in human brain. We show most risk genes are more complex than previously  
20 reported, identifying 440 novel isoforms and 28 novel exons, including isoforms which alter protein  
21 domains, and genes such as *ATG13* and *GATAD2A* where most expression was from previously  
22 undiscovered isoforms. The greatest isoform diversity was present in the schizophrenia risk gene  
23 *ITIH4*. Mass spectrometry of brain protein isolates confirmed translation of a novel exon skipping  
24 event in *ITIH4*, suggesting a new regulatory mechanism for this gene in brain. Our results emphasize  
25 the widespread presence of previously undetected RNA and protein isoforms in brain and provide an  
26 effective approach to address this knowledge gap. Uncovering the isoform repertoire of  
27 neuropsychiatric risk genes will underpin future analyses of the functional impact these isoforms have  
28 on neuropsychiatric disorders, enabling the translation of genomic findings into a pathophysiological  
29 understanding of disease.

## 30 Introduction

31 Over 90% of multi-exonic human genes undergo alternative splicing (AS), a process that enables  
32 genes to produce multiple mRNA products (RNA isoforms) [1]. Common AS events include exon  
33 skipping, intron retention and alternative 5' and 3' exonic splice sites [2]. These mRNA alterations  
34 can impact the open reading frame (ORF) and/or alter post-transcription regulation and translation of  
35 an RNA, increasing both transcriptomic and proteomic diversity [1, 3, 4]. AS has been established as  
36 an important regulator of organ development and physiological functions and is highly regulated  
37 under normal conditions [5, 6]. Conversely, aberrant RNA splicing has been linked to the  
38 development of cancer, autoimmune and neurodevelopmental disorders [7-11]. AS plays an especially  
39 important role in the brain, which has a distinct splicing program including the largest number of  
40 tissue specific exons and frequent use of microexons [12]. Numerous studies have reported crucial  
41 roles for AS in brain development and dysregulation in disease [13, 14].

NOTE: This preprint reports new research that has not been certified by peer review and should not be used to guide clinical practice.

42 Neuropsychiatric or mental health disorders (MHDs) including schizophrenia (SZ), major depressive  
43 disorder (MDD), autism spectrum disorder (ASD) and bipolar disorder (BD) can carry significant  
44 morbidity for affected individuals [15]. Comorbidities, delayed diagnoses and stigma surrounding  
45 MHDs also present a significant challenge to individuals and their families [16]. However, treatment  
46 options remain limited or are not well tolerated or effective in some individuals and the underlying  
47 aetiology of disease and risk remains poorly understood [17-19]. Recently, large genome wide  
48 association studies (GWAS) have revealed hundreds of common single nucleotide polymorphisms  
49 (SNPs) that are associated with risk of developing neuropsychiatric disease [20-25]. The vast majority  
50 of these variants are found in non-coding parts of the genome and are expected to be regulatory,  
51 impacting gene expression levels or which RNA isoforms are produced. For example, risk variants  
52 could impact splicing factor binding potentially resulting in novel RNA isoforms, gross transcript  
53 alterations or changes to isoform splicing ratios [8]. Confirmatory studies including transcriptome  
54 wide association studies (TWAS), summary data-based Mendelian randomization (SMR) [26],  
55 multimarker analysis of genomic annotation (MAGMA) and variants (H-MAGMA [27], nMAGMA  
56 [28]) and functional genomics have helped to identify the risk genes at these loci and also showed a  
57 considerable number of risk loci are shared between disorders [29]. However, there is a current lack  
58 of understanding about how risk gene expression and splicing are altered by the risk variants and  
59 therefore profiling both their expression and RNA isoforms is essential to link genetic changes to  
60 disease pathophysiology.

61 Current sequencing technologies including Illumina short-reads perform well at detecting novel AS,  
62 however the lack of long-range exon connectivity information inherent in short-reads means these  
63 approaches are limited in their ability to identify and quantify full-length isoforms and this issue is  
64 exacerbated in longer, more complex genes [30, 31]. In contrast, long-read technologies including  
65 nanopore sequencing from Oxford Nanopore Technologies (ONT) and Pacific Biosciences (PacBio)  
66 single-molecule, real-time sequencing can sequence entire isoforms in a single read enabling more  
67 accurate isoform profiling [7, 32]. Such technologies now make it feasible to comprehensively  
68 examine gene isoform profiles. Initial investigations of *SNX19* and *CACNA1C* demonstrated the  
69 incomplete knowledge of isoform profiles in humans and the likely importance of novel MHD risk  
70 gene isoforms in disease [33, 34].

71 In this study we addressed the lack of knowledge surrounding MHD risk gene isoform expression  
72 using nanopore amplicon sequencing. We developed a new bioinformatic tool, IsoLamp, to identify  
73 known and novel RNA isoforms from long-read data. Analysis of the RNA splicing profiles of 31  
74 MHD risk genes identified 360 novel RNA isoforms and 28 novel exons. We identified several genes  
75 where most expression is from novel isoforms, including *ATG13* and *GATAD2A*, where the most  
76 highly expressed isoforms were novel. Our results show the transcript structure for most risk genes is  
77 more complex than current annotations, containing additional exon skipping events, retained introns,  
78 novel splice sites and novel exons, including novel isoforms that alter the protein and potentially its  
79 function. This work lays the foundation for a better understanding of how risk gene isoforms may play  
80 a role in disease pathophysiology.

## 81 **Methods**

### 82 **Sample preparation and QC**

83 Healthy control post-mortem human brain samples were obtained from six individuals collected  
84 through the Victorian Brain Bank (VBB) under HREC approval #12457. Brain samples from two  
85 further individuals with a non-control phenotype were also obtained from the VBB for protocol  
86 testing and validation purposes. Age, sex and additional details including the post-mortem interval  
87 (PMI), pH and tissue weight are shown in Supplementary Table 1. Briefly, samples comprised 5  
88 males and 1 female, age range: 51 – 72 yrs, PMI range: 31 – 64 hrs and pH range: 5.7 – 6.7. Frozen

89 tissue (weight range: 57 – 135 mg) was cut from seven brain regions including Brodmann areas (BA),  
90 BA9 (dorsolateral prefrontal cortex (DLPFC)), BA46 (medial prefrontal cortex (MPFC)), BA10  
91 (fronto-parietal cortex (FPC)), Brodmann Area 24 (dorsal anterior cingulate cortex (dACC)), caudate,  
92 cerebellum and temporal cortex. Total RNA was extracted from bulk tissue in eight randomised  
93 batches of 3 – 6 samples. First, frozen brain tissue was homogenised on ice, using a manual tissue  
94 grinder (Potter-Elvehjem, PTFE), whilst immersed in 1 mL QIAzol Lysis Reagent (QIAGEN). Lysate  
95 was then processed using a RNeasy Lipid Tissue Kit (QIAGEN, 74804), according to the  
96 manufacturers' instructions. Isolated RNA quality and quantity was checked using a Qubit 4  
97 Fluorometer (2  $\mu$ L), TapeStation 4200 (RNA integrity number equivalent (RINe), cut-off = 6) and  
98 Nanodrop 2000.

### 99 **Database curation and risk gene selection**

100 MHD risk genes were selected for long-read amplicon sequencing using an internal database that  
101 aimed to collate evidence from the literature of gene involvement in disease risk from the original  
102 GWAS, meta-analyses including MAGMA (and variants including eMAGMA, hMAGMA,  
103 nMAGMA), TWAS, SMR and follow-up studies including fine mapping, protein-protein interaction  
104 (PPI), epigenetic (DNA methylation) and targeted experimental validation (Supplementary Figure 1).  
105 The foundation of this database was a list of significant GWAS SNPs for SZ, BD, MDD and ASD.  
106 Association data was downloaded from the NHGRI-EBI GWAS Catalog [35]. MHD GWAS  
107 associations were filtered on the 'Disease/Trait' column to exclude effects of treatments including  
108 pharmaceutical, mixed disorder studies and associations with behavioural traits like smoking or  
109 alcohol intake. Associations were excluded if both the 'reported gene' column was 'not reported  
110 (NR)' and the 'mapped gene' column was blank. Date data was downloaded, filters applied, and  
111 percentage associations retained are detailed in Supplementary Table 2.

112 Follow-up studies and experiments were then identified in the literature and the reported genes were  
113 manually collated and assigned to an 'evidence' category as described above. Each evidence category  
114 had the following information headers including the PubMed ID of the reporting manuscript, the first  
115 author and the reported SNP and gene. An R script (Supplementary File 1) was used to curate risk  
116 genes and appearances in unique studies. Counts of reported risk genes and unique studies, for each  
117 evidence category, were then combined with the original GWAS table. Risk genes were then sorted  
118 by evidence (high to low), separately for each MHD. A multi-trait evidence list was also made by  
119 combining each MHD table together and again sorting by descending evidence. This gave us  
120 flexibility to focus on risk genes that appeared to be specific to a single MHD or those with shared  
121 risk across disorders.

### 122 **Primer design, cDNA synthesis and long-range PCR**

123 Thirty-one (31) MHD risk genes were selected from our database and the full coding sequence (CDS)  
124 from the canonical isoform was downloaded from the UCSC Genome Browser [36]. Primers, located  
125 in the 5' and 3' UTRs, were designed to amplify the CDS using Primer3 Plus [37]. Additional primers  
126 were made to amplify alternative start or end sites that were not captured by a single primer pair.  
127 Additional UCSC track sources including expressed sequence tags (EST), transcript support level  
128 (TSL), APPRIS designation, human mRNA support, cap-analysis of gene expression (CAGE) peaks,  
129 CpG islands and H3K4Me3 marks were examined to ensure there was enough evidence that  
130 alternative start or end sites were real before a primer was designed [38]. All primers, primer  
131 combinations and modified Primer3 Plus settings are listed in Supplementary Table 3. Risk gene  
132 primers from Primer3 Plus were aligned to tracks on the UCSC Genome Browser using BLAT for  
133 visualisation and tested using the In-Silico PCR [39].

134 To amplify risk gene CDS, 1  $\mu$ g of total RNA was used as template for cDNA synthesis using  
135 Maxima H Minus Reverse Transcriptase (Thermo Fisher Scientific, EP0752, 200 U/ $\mu$ L) according to  
136 the manufacturers' instructions. Two duplicate cDNA plates were generated simultaneously to reduce

137 variability and provide enough template for multiple risk gene PCRs. Risk genes were amplified using  
138 one of following DNA polymerases; LongAmp® Taq 2X Master Mix (NEB, M0287S), Platinum™  
139 SuperFi II PCR Master Mix (Thermo Fisher Scientific, 12368010) or PrimeSTAR GXL (TakaraBio,  
140 R050B). Each set of gene primers were individually optimised by adjusting PCR cycling conditions  
141 (Supplementary Table 3) until sufficient pure template (~1 – 10 ng) could be produced for input to  
142 barcoding. Short-fragments and primer-dimer were removed prior to barcoding using AMPure XP  
143 beads (Beckmann Coulter) at 0.5 – 0.8x ratios to PCR volume. An overview of the experimental  
144 protocol is shown in Figure 1A.

#### 145 **Long-read amplicon sequencing**

146 Barcoding conditions for sample multiplexing (N=35, EXP-PBC096, ONT) and library preparation  
147 for long-read sequencing followed the recommended ligation sequencing protocol (Figure 1A) (SQK-  
148 LSK109/110, ONT). All barcoding PCR was done using LongAmp® Taq 2X Master Mix with an  
149 amplicon specific extension time (approximately 1 min/Kb) and 10 – 15x cycles. AMPure clean-up  
150 following adaptor ligation was adjusted from the default ratio of 0.4X depending on the length of the  
151 target amplicon. Adaptor ligated libraries were loaded (25 – 35 fmol) onto MinION (FLO-MIN106)  
152 flow cells and a minimum of 10,000 reads per sample were targeted before flushing and storing the  
153 flow cell. All runs were re-basecalled using the super-accurate (SUP) basecalling model (Guppy  
154 v6.0.17, 2022) and minimum qscore = 10.

#### 155 **Isoform discovery from long-read amplicon sequencing with IsoLamp**

156 We developed a new bioinformatic pipeline, IsoLamp, for the analysis of long-read amplicon data  
157 (Figure 1B). First, pass reads were down sampled [40] to a consistent number (8000) per barcode and  
158 mapped to the reference genome with minimap2 (v2.24) [41]. Then, low accuracy reads (< 0.95) were  
159 removed and samples were merged prior to isoform identification. Read accuracy was calculated  
160 using CIGAR strings in the BAM files and is defined as:  $(\text{'X'+'='+'I'+'D'} - \text{'NM'}) / (\text{'X'+'='+'I'+'D'})$ .  
161 Next, the merged BAM file of high accuracy reads was used as input for isoform discovery with  
162 Bambu (v3.2.4) using the following parameters: novel discovery rate (NDR) = 1 and  
163  $\text{min.fractionByGene} = 0.001$  [42]. Next, isoforms identified with Bambu were filtered to remove any  
164 with zero expression and to retain only isoforms with start and end positions overlapping the known  
165 primer coordinates using bedtools intersect (v2.30) [43] to retain only isoforms with start and end  
166 positions overlapping the known primer coordinates. Finally, the remaining isoforms were used to  
167 create an updated transcriptome with GffRead (v0.12.7) [44], and reads from each barcode were  
168 quantified with salmon in alignment-based mode (v0.14.1) [45, 46] and isoforms were annotated with  
169 GffCompare (v0.12.6) [44]. The pipeline outputs a list of isoform annotations (.gtf), isoform  
170 expression as transcripts per million (TPM) and proportion of overall gene expression, as well as a  
171 report summarising the results. An optional TPM filter was also applied to further filter isoforms  
172 which required a minimum TPM of 5000. If the user specifies a grouping variable for their input  
173 samples, a t-test is performed between isoform proportions between groups and p-values are adjusted  
174 for the false discovery rate (0.05).

175 **A**

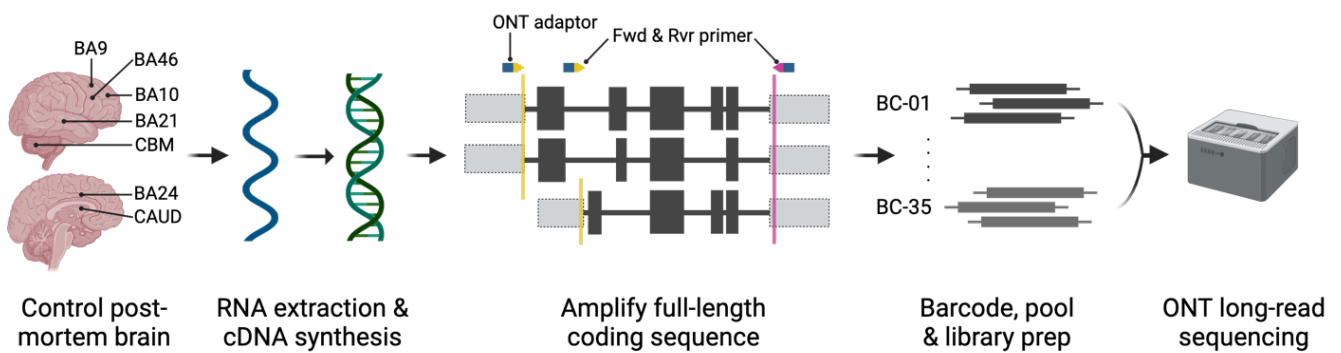

176

177 **B**

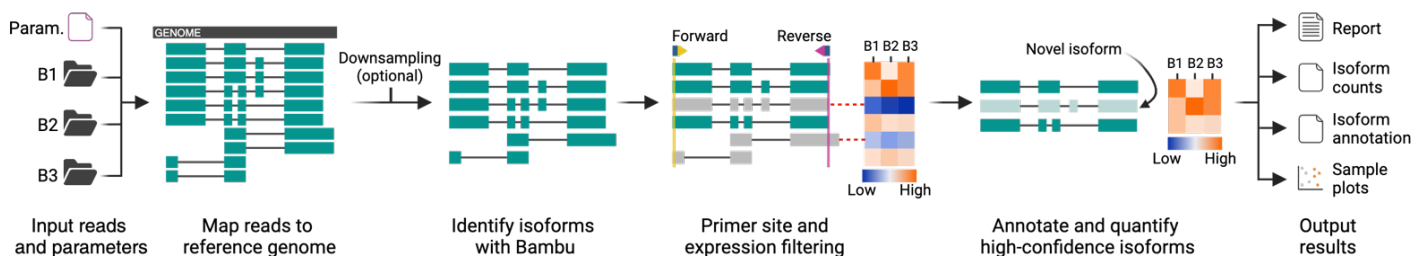

178

179 **Figure 1A. RNA isoform sequencing of human post-mortem brain.** RNA was isolated from frontal cortical  
 180 regions, caudate (CAUD) and cerebellum (CBM) and converted to cDNA. The coding sequence (black boxes)  
 181 was amplified using specific forward (Fwd, yellow arrows) and reverse (Rvr, pink arrow) primers generally  
 182 designed in the 5' and 3' UTR regions (grey boxes) to capture as many isoforms as possible. An Oxford  
 183 Nanopore Technologies (ONT) adaptor sequence (blue box) was incorporated into each primer for sample  
 184 multiplexing. Samples were then barcoded and pooled to create a single library for long-read sequencing on a  
 185 GridION. Key: Brodmann Area (BA), barcode (BC), Oxford Nanopore Technologies (ONT). **B. Isoform discovery**  
 186 **with long-read amplicon sequencing (IsoLamp) workflow.** A gene specific parameters file (containing  
 187 chromosome and primer coordinates) was used to align long-reads for each sample (B1-3) against the  
 188 reference (black box) using Minimap2. Known and novel RNA isoforms were identified using Bambu. Identified  
 189 isoforms are then filtered (grey isoforms) on correct forward (yellow line) and reverse (pink line) primer  
 190 position ensuring full-length isoform discovery. Low expression (blue on heatmap) isoforms were also filtered  
 191 out as indicated by dashed red lines. Filtered known and novel isoforms can then be annotated, quantified  
 192 using IsoLamp output files and visualised using IsoVis.

193



194 We benchmarked the performance of the IsoLamp pipeline using Spike-in RNA Variant (SIRV) Set 1  
195 synthetic RNA controls (Lexogen). SIRV isoforms are present in three mixes (E0, E1, E2) that  
196 contain isoforms in varying known concentrations. Primers were designed to amplify from the first to  
197 the last exon (as described above) of SIRV5 and SIRV6 genes from cDNA generated in triplicate  
198 from each SIRV mix (N=27) (Supplementary Figure 2). PCR amplification conditions for SIRV  
199 amplicons are shown in Supplementary Table 4. Samples were barcoded and sequenced as described  
200 above, and subsequent basecalling and demultiplexing was performed with Guppy (v6.0.17, SUP,  
201 2022). The IsoLamp pipeline was compared against three other isoform discovery tools: StringTie2  
202 [47], FLAIR [48] and Bambu (using both default parameters and the optimised parameters used in  
203 IsoLamp). The sensitivity, specificity, accuracy and correlations (expected versus observed counts) of  
204 the programs were compared using three SIRV reference annotations: complete (C), incomplete (I)  
205 (missing isoforms, to test ability to recover unannotated true positive isoforms) and over (O) (extra  
206 isoforms, to test ability to minimise false positive annotated isoforms). Novel isoforms were  
207 categorised using SQANTI (v4.2) against the human reference (GENCODE release 41,  
208 GRCh38.p13). Finally principal component analyses (PCA) were done on a combined dataset of  
209 expression values for each known and novel isoform and its associated metadata including brain  
210 region, gene, RINe, pH, individual, PMI and age.

### 211 **Novel exon validation**

212 Nanopore long-read supported novel exons were validated by RT-PCR. Amplicons were designed  
213 from the known 5' flanking exon into the novel exon and from the novel exon into the known 3'  
214 flanking exon. An amplicon spanning the known 5' and 3' flanking exons was used as a positive  
215 control. Primers were designed using Primer3 [37] and checked using Primer BLAST [49] and are  
216 listed in Supplementary Table 5. In some cases, the primer design space was restricted by the novel  
217 exon sequence length and/or nucleotide composition. Novel exon amplifications were done using *Taq*  
218 2X MasterMix (NEB, M0270L) and cycling conditions can also be found in Supplementary Table 5.  
219 PCR products were visualised via gel electrophoresis using GelGreen® Nucleic Acid Stain (Biotium,  
220 41005) and GeneRuler 100 bp ladder (TFS, SMN0243). PCR products in the expected size range were  
221 cleaned up using AMPure XP Reagent (Beckmann Coulter, A63881) at a 1.8X ratio to remove  
222 fragments <100 bp and sent for Sanger sequencing (100 – 200 bp, AGRF).

### 223 **Protein isolation and novel sequence detection using targeted mass spectrophotometry (MS)**

224 Post-mortem frontal cortex and cerebellum brain samples (mean weight = 53.25 mg) were used for  
225 protein isolation. Samples were from a healthy 59 yo female and 74 yo male with PMIs of 30 and 22  
226 hrs respectively who had no known neurological or neuropsychiatric conditions. Briefly, samples  
227 were lysed in 500  $\mu$ L of guanidinium-HCl buffer using tip-probe sonication, heated briefly to 95  $^{\circ}$ C  
228 and diluted 1:1 with LC-MS water before 4 mL of ice-cold acetone was added to precipitate protein  
229 overnight at -30  $^{\circ}$ C. Supernatant following a wash (3 mL 80% cold acetone) and incubation (-30  $^{\circ}$ C, 1  
230 hr) was discarded and protein air-dried (RT, 30 mins). The protein pellet was resuspended in 500  $\mu$ L  
231 10% TFE in 100 mM HEPES (pH 7.5) and sonicated. Protein concentration was estimated with BCA  
232 (1  $\mu$ L sample + 9  $\mu$ L 2% SDS). Normalised protein (10  $\mu$ g/10  $\mu$ L) was then digested using a  
233 combination of LysC/trypsin or GluC for all samples. Finally, digested peptides were analysed using  
234 an OrbiTrap Eclipse mass spectrophotometer using known peptide targets informed by long-reads.  
235 Protein structure prediction was done using AlphaFold accessed through UCSF ChimeraX (v1.5) [50-  
236 52].

### 237 **Data visualisation**

238 The publicly available web-tool IsoVis (v1.1, <https://isomix.org/isovis/>) was used to visualise RNA  
239 isoforms and associated expression data (Wan et al., 2024, *under review*). Known and novel RNA  
240 isoforms are represented as a stack to compare alternative splicing events between different isoforms.  
241 Read counts assigned to each RNA isoform for each of the 35 samples were visualised as a heatmap.

## 242 **Results**

### 243 **Experimental overview**

244 To identify the RNA isoforms expressed from genes of interest we aimed to perform long-read  
245 amplicon sequencing, which provides a highly sensitive means for comprehensive isoform discovery  
246 and relative quantification (Figure 1A) [33]. We selected seven regions of post-mortem human brain,  
247 encompassing both transcriptionally divergent regions as well as those highly implicated in MHDs.  
248 Amplicons were designed cover the full coding region of target genes and, where possible, run from  
249 the first to the last exon. Multiple set of primers were used for genes with alternative transcriptional  
250 initiation and termination exons and/or alternative coding sequence initiation and termination sites.

### 251 **IsoLamp: a tool for RNA isoform discovery from long-read amplicon sequencing**

252 While there are several long-read isoform discovery and quantification tools, these are not generally  
253 optimised for amplicon sequencing of single genes at high depth. Therefore, we created ISOform  
254 discovery with Long-read AMPlicon sequencing (IsoLamp), a custom pipeline designed for isoform  
255 profiling from amplicon sequencing (Figure 1B). In contrast to previous tools [33] IsoLamp can be  
256 applied to any gene, provides flexible filtering options and provides a simpler, unified, output of  
257 isoforms.

258 We benchmarked the performance of IsoLamp using synthetic Spike-in RNA variants (SIRVs) that  
259 provide a known ground truth for isoform exonic structures and abundances. We performed long-read  
260 amplicon sequencing on SIRV5 and SIRV6, targeting five isoforms per gene, as these SIRVs allowed  
261 targeting of the largest number of isoforms with a single primer pair and so best recapitulated human  
262 genes. The SIRV dataset comprised nine replicates from each of the three SIRV mixes (E0, E1, E2)  
263 for each gene. 99% of reads mapped to the SIRV genome with minimap2 [41], confirming on-target  
264 amplification. We benchmarked the performance of IsoLamp with Bambu [42], FLAIR [48],  
265 FLAMES [53] and Stringtie2 (-L) [47]. We assessed the precision, recall and expression correlations  
266 of the five tools using three different reference annotations (Figure 2A-C, Supplementary Figure 3,  
267 Supplementary Table 6): **1. Complete** - contains all SIRV isoforms, **2. Insufficient** - missing SIRV  
268 isoforms known to be present, and **3. Over** – contains additional isoforms that are not present in the  
269 SIRV mixes.

270 Our benchmarking results demonstrated IsoLamp had the highest precision and recall values,  
271 consistently outperforming other isoform discovery tools by correctly identifying true isoforms and  
272 minimising false positives (Figure 2A, Supplementary Table 6). This included maintaining high  
273 performance with the more challenging, but also more realistic, insufficient and over annotation  
274 references. IsoLamp expression quantification was also consistently accurate and maintained  
275 performance irrespective of the annotation provided (Figure 2B, C).

276 Bambu, which is also utilised within the IsoLamp pipeline, was the next best performing tool although  
277 it identified more false positives and had poorer recall and quantification results using the insufficient  
278 annotation (Figure 2A-C). IsoLamp utilises Bambu parameters optimised for amplicon-sequencing,  
279 including a novel discovery rate (NDR) of 1. Adjusting the Bambu 'NDR' to 1 improved its recall but  
280 didn't improve precision (Figure 2A-C, Supplementary Table 6). These results demonstrate how  
281 IsoLamp outperforms tools designed for whole-transcriptome analysis, including when Bambu is  
282 provided with optimised isoform discovery parameters for amplicon sequencing.

283 FLAIR had the highest number of isoforms of all tools tested identifying 261, 181, and 278 novel  
284 transcripts in the complete, insufficient, and over-annotated reference-based analyses, respectively. This  
285 high level of false-positive novel transcripts led to inaccuracies in transcript abundance assignments,  
286 resulting in low correlations compared to other tools (Figure 2A-C). FLAMES exhibited 100% recall  
287 for SIRV5 across all annotations, however, its performance with SIRV6 was suboptimal, indicating a  
288 higher degree of variability in the FLAMES isoform discovery pipeline. FLAMES also performed

289 poorly for isoform quantification. Lastly, while Stringtie2 did not introduce large numbers of false  
 290 positives, it had the highest number of false negatives, including when provided with complete  
 291 annotations (Figure 2A-C, Supplementary Table 6).

292 IsoLamp employs an optimised expression-based filter to remove lowly expressed isoforms that are  
 293 likely to be false positive detections. Applying this filter to Bambu, FLAIR, and FLAMES  
 294 substantially reduced false positive novel isoforms and enhanced overall precision (Supplementary  
 295 Figure 3, Supplementary Table 6), though IsoLamp was still the top performing tool. Beyond  
 296 synthetic benchmarking data, reference annotations are typically a combination of insufficient and  
 297 over annotations. In such scenarios, IsoLamp demonstrated better or comparable correlations with all  
 298 other tools (Figure 1A-C, Supplementary Figure 3), suggesting its superiority for amplicon-  
 299 sequencing based isoform discovery and quantification from real biological data.

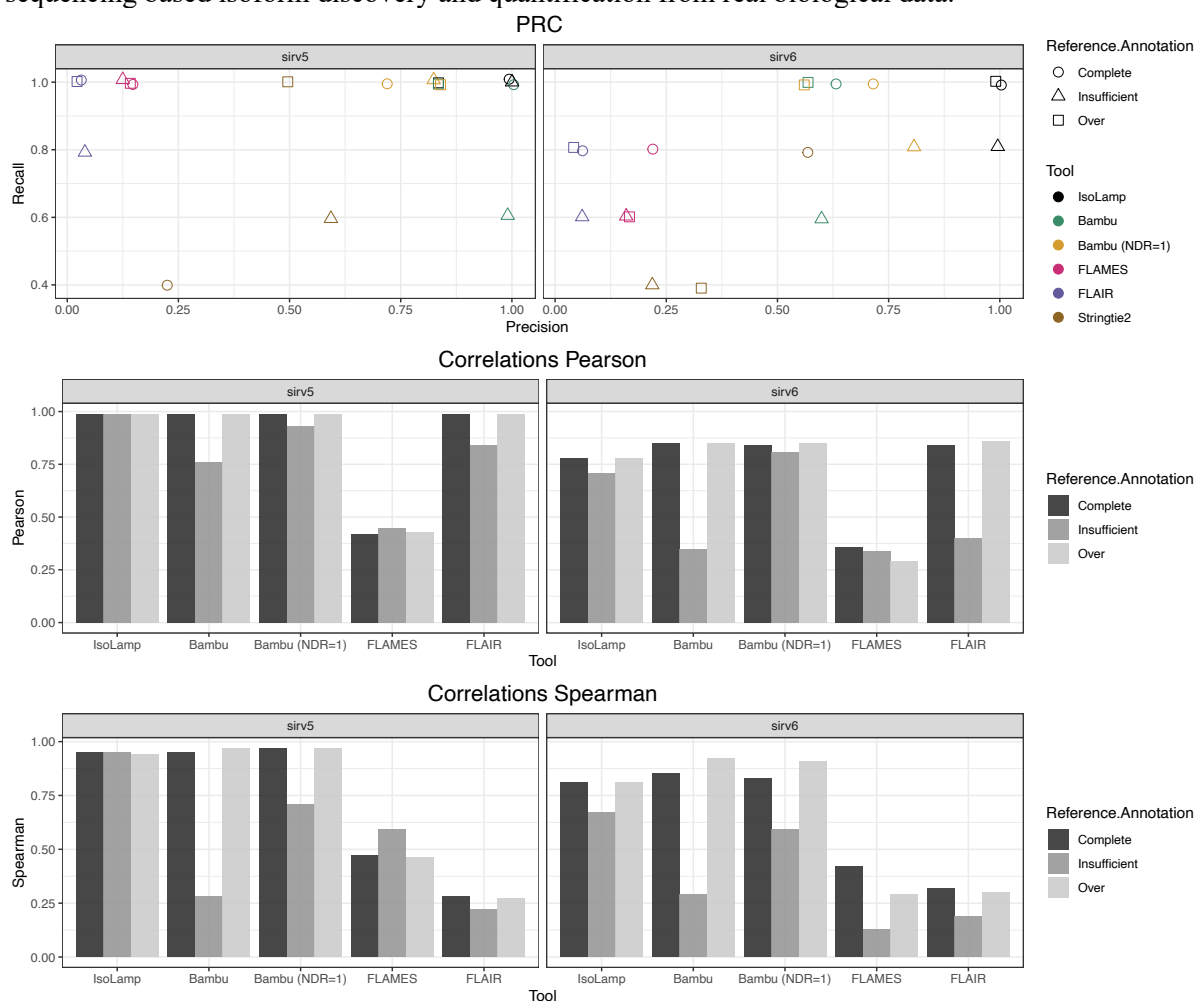

300  
 301 **Figure 2. Benchmarking IsoLamp using spike-in SIRVs. A.** Precision recall of each tested pipeline with the  
 302 complete, insufficient or over annotated SIRV reference. IsoLamp (black) returned high quality isoforms from  
 303 amplicon data of both SIRV5 and 6. Pearson (B) and Spearman (C) correlations for each pipeline between  
 304 known and observed expression values for SIRV 5 and 6 mixes.

### 305 Post-mortem human brain RNA quantity and quality

306 Total RNA for long-range amplicon sequencing was extracted from 7 brain regions from 5 healthy  
 307 individuals (Ind01 - 05) and subject to sample QC (Supplementary Figure 4A-D). RINe (mean = 7.4,  
 308 range = 6 - 8.1) did not differ by brain region, however Ind04 had significantly lower RINe scores  
 309 (Supplementary Figure 4B). No trend between the PMI (mean = 44.25 hrs) and RINe was observed  
 310 (Supplementary Figure 4C). RINe appeared to worsen with decreasing brain tissue pH levels  
 311 (Supplementary Figure 4D). A principal component analysis (PCA) showed separation of Ind04



312 (likely driven by lower sample pH and RINe) and of cerebellum and caudate samples from cortical  
 313 regions in PC1 and PC2 (Supplementary Figure 5AB). A relatively small proportion of variance  
 314 (4.7%) was attributed to control donor age in PC5 (Supplementary Figure 5C).

315 **Long read sequencing identifies 360 novel RNA isoforms**

316 A total of 31 risk genes were selected for amplicon sequencing based on the accumulated evidence for  
 317 their involvement in neuropsychiatric disorder risk. A custom database of risk genes and their  
 318 evidence levels was created and genes ranked (Methods). In a reflection of current GWAS cohort  
 319 sizes, 21 of the selected genes had the highest evidence for involvement in risk for SZ, 7 for MDD, 2  
 320 for ASD and 1 for BPD (Figure 3A). Evidence from GWAS, TWAS and other studies show that some  
 321 genes appear to be risk factors for multiple disorders including *KLC1* for SZ, MDD and ASD (Figure  
 322 3B).

323

324 **A**

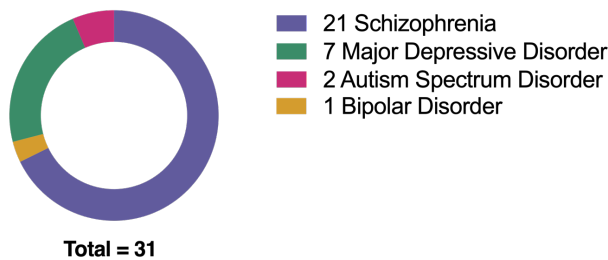

325

326 **B**

327

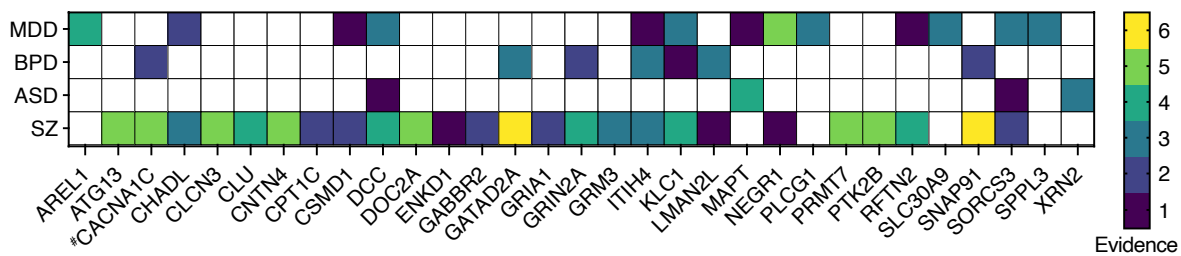

328

329 **Figure 3. Selection of high-confidence MHD risk genes for amplicon sequencing.** **A.** Risk genes included in this  
 330 study classified by the disorder for which they have the highest evidence of association. **B.** Sequenced genes  
 331 and their evidence levels for each MHD. The evidence count was calculated as the sum of independent analysis  
 332 types for example, GWAS, MAGMA, TWAS, SMR, DNA methylation, fine mapping, protein-protein interaction  
 333 and targeted validation studies, that supported gene involvement in risk for a particular disorder. #Indicates re-  
 334 sequencing of a gene from a previous study (Clark *et al.* 2019).

335

336 The full RNA isoform profile for each gene was sequenced using nanopore long-read amplicon  
337 sequencing. Mapping accuracy ranged from 93.7% (*CLCN3*) to 97.5% (*SORCS3*) (Supplementary  
338 Figure 6A, B). Each novel isoform and its predicted impact on known protein domains, open reading  
339 frame (ORF) and associated instability index was recorded (Supplementary File 2) and visualised  
340 using IsoVis (Supplementary File 3) (Wan et al., 2024, *under review*). With no TPM filter set in  
341 IsoLamp we identified 872 known and novel isoforms across all 31 neuropsychiatric disorder risk  
342 genes. To filter this list for more highly expressed novel isoforms we applied a TPM filter which  
343 resulted in 440 known and novel isoforms across all genes (Figure 4A). Of these, SQANTI [54]  
344 classified 80 as known (full splice match (FSM)), 266 as novel but using only known splice sites or  
345 junctions (novel in catalogue (NIC)), and 95 as containing at least one novel splice site (novel not in  
346 catalogue (NNC)) (Figure 4A).

347 We next asked what proportion of reads for each gene were assigned to novel isoforms (Figure 4B).  
348 This ranged widely from approximately 96.9% for *GATAD2A* to 0% for *GRIN2A*, which was the only  
349 gene for which no novel RNA isoforms were detected. Approximately one quarter (7/31) of genes  
350 investigated had most of their gene expression assigned to novel isoforms, demonstrating how  
351 isoforms and their expression profiles for many genes are still poorly understood. As our amplicon-  
352 sequencing does not encompass all variations in transcriptional initiation and termination sites, these  
353 results can be seen as a lower bound for novel isoforms and their expression proportions. Linear  
354 regression of gene isoform counts (Supplementary Figure 7) and novel isoform proportion did not  
355 reveal a significant relationship with amplicon length or canonical exon count, indicating that  
356 detection of novel isoforms is largely gene dependent (Supplementary Figure 8A-D). To determine  
357 what was different about the splicing pattern of each novel isoform we further sub-classified them  
358 using SQANTI, based on the use of a combination of known exon junctions (COJ) or splice sites  
359 (COS), retained intron (RI) or containing at least one novel splice site (ALO) (donor, acceptor or pair)  
360 [54]. Overall, the most reads were assigned to “novel combination of known junctions”, where all  
361 individual exon combination were known but the entire chain of exons was novel. The type and  
362 proportion of novel isoforms from each category was highly gene specific, demonstrating a wide  
363 variety of novel RNA types missing from current gene annotations.

364

365 A

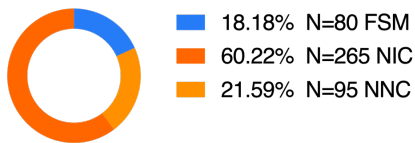

Total = 440

366

367 B

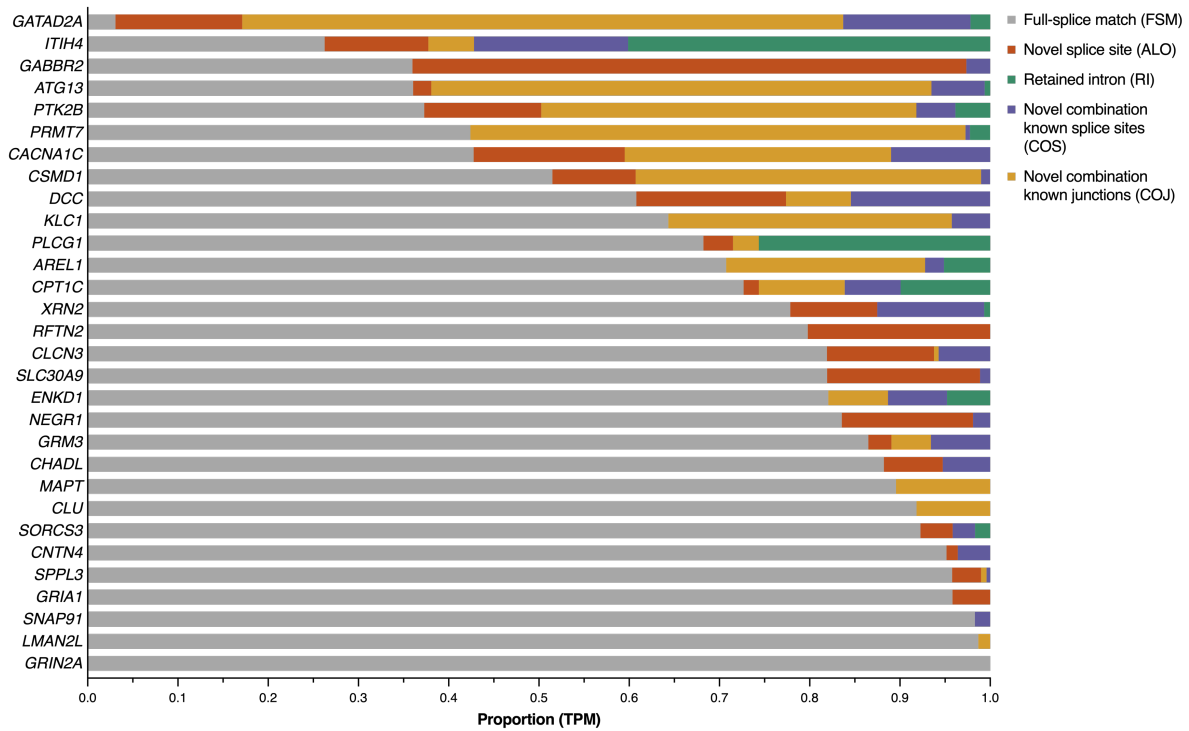

368

369 C

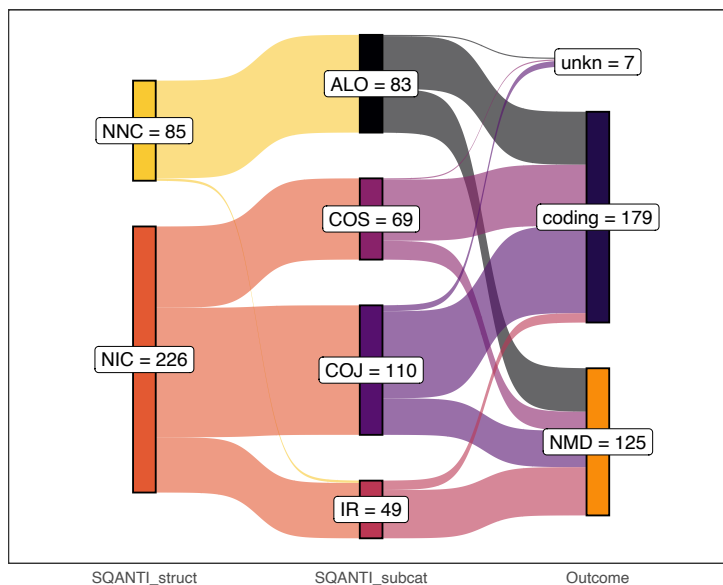

370

371

372 **Figure 4. A.** The total number of known and novel isoforms identified across all 31 risk genes. SQANTI  
373 structural categories are known/full splice match (FSM), novel in catalogue (NIC) and novel not in catalogue  
374 (NNC). **B.** Proportion of reads for each gene as classified by the SQANTI sub-category. **C.** Count of predicted  
375 outcomes for novel isoform subcategories. ExPasy (Gasteiger *et al.*, 2003) was used to examine the open  
376 reading frame (ORF) of novel isoforms (SQANTI structural category: novel not in catalogue (NNC) or novel in  
377 catalogue (NIC)) using the canonical start and stop as a reference. Predictions were categorised as coding if the  
378 ORF was retained, nonsense mediated decay (NMD) if a premature termination codon was present and not  
379 within 50 nt of the final exon junction or unknown (unkn) if there was not enough information. Novel isoform  
380 SQANTI subcategories (subcat) are, at least one novel splice site (ALO), intron retention (IR) and combination  
381 of known junctions (COJ) or splice sites (COS).

382

383 The impact of each novel isoform on the encoded ORF was examined using ExPasy [55] and recorded  
384 as retaining the canonical or other known reading frame (coding), likely-NMD or unknown. Novel  
385 isoforms were classified as coding for 54.2%, 67.3% and 75.4% for ALO, COJ and COS  
386 subcategories respectively. We identified 49 novel isoforms that contained retained introns, 39 (83%)  
387 of which were predicted to lead to NMD (Figure 4C).

388 Isoforms that contained ‘at least one novel splice site’ (ALO) generally contained a novel deletion  
389 within a known exon or had novel donors and/or acceptors. All novel junctions in ALO isoforms were  
390 canonical GT-AG, GC-AG or AT-AC junction pairs, though often only the splice donor (GT) or  
391 acceptor (AG) was novel (Supplementary Figure 9A). We found that ~47% of ALO isoforms  
392 contained either a single novel splice donor or acceptor. Novel GC-AG pairing was detected in two  
393 SZ risk genes, within the 5’UTR of *GABBR2* and the donor site of a novel exon in *RFTN2*. These  
394 results show a clear advantage of using long-read sequencing to contextualise novel splice sites which  
395 aids in predicting the outcome on the isoform and ORF.

#### 396 **Detection of highly expressed novel isoforms**

397 A key question regarding novel isoforms is whether they are expressed at high enough level to impact  
398 the biological function of a gene. This is a complex question, because a novel isoform could be low at  
399 the tissue level but highly abundant in a specific cell type, or multiple expressed novel isoforms can  
400 be significant cumulatively, especially if they all encode the same change to a protein. Therefore, we  
401 focused on genes with significant individual or cumulative expression of novel isoforms (analysis on  
402 all gene isoforms is available in Supplementary File 2).

403 We identified 22 novel isoforms for the schizophrenia risk gene autophagy-related protein 13  
404 (*ATG13*). Novel isoforms represented 64% of gene expression, compared to 36% for full-splice  
405 matches. The most abundant class of novel isoforms (15/22) were COJ, which made up 55.4% of gene  
406 expression (Figure 4B). *ATG13* had two alternative splicing hotspots, firstly with the 5’UTR and  
407 secondly around a predicted disordered region involving exons 12 and 13 in the canonical isoform.  
408 Across all brain regions the most highly expressed isoform was the novel COJ transcript 26 (Tx26),  
409 which represented 23% of total reads, surpassing the canonical transcript ENST00000683050  
410 (12.8%). Tx26 differs from the canonical transcript by skipping of exon 12. It contains the same CDS  
411 as ENST00000359513 but includes an additional exon in the 5’UTR (exon 3). Novel COJ transcripts  
412 6 and 8 also had high read counts and together accounted for 16.6% of expression. These isoforms  
413 were novel due to a combination of 5’UTR exons not previously seen within full-length GENCODE  
414 annotations (Figure 5A, B).

415 The schizophrenia risk gene CUB and sushi multiple domains 1 (*CSMD1*) was the longest CDS we  
416 amplified at approximately 10,838 nt encompassing 70 coding exons. In total 8/9 detected isoforms  
417 were classified as novel. Following the canonical isoform (ENST00000635120, 51.5% of reads),  
418 novel transcripts 26 (COJ) and 33 (ALO) accounted for 38.3% and 7.1% of assigned reads,

419 respectively (Figure 5C, D). Novel Tx26 skipped known exon 65 which encodes a sushi 28  
420 extracellular domain and glycosylation site. The ORF of Tx26 retained the reading frame encoding a  
421 3549 amino acid (aa) protein. Novel Tx33 contained a novel splice donor (GT, -8 nt) in canonical  
422 exon 21 predicted to lead to a PTC in canonical exon 22. The full Tx33 mRNA also skipped canonical  
423 exon 65. *CSMD1* also provides a useful example of the benefit of long read for profiling isoforms.  
424 GTEx isoform expression data (<https://www.gtexportal.org/home/gene/CSMD1>) for *CSMD1* in brain  
425 is almost exclusively assigned to isoforms with downstream transcriptional initiation sites (including  
426 the two-exon fragment ENST00000521646), despite splice junction level expression largely  
427 supporting expression from the canonical start site. This emphasises the difficulty of assembling and  
428 quantification expression of full-length isoforms from long, complex genes, which can be achieved  
429 using long isoform spanning reads.

430 The chromatin remodelling subunit and shared SZ and BPD risk gene GATA zinc finger domain  
431 containing 2A (*GATAD2A*) had one of the highest proportions of reads (96.9%) assigned to novel  
432 isoforms. Most novel isoforms were predicted to be coding COJs (10/24) and these also accounted for  
433 the majority of novel read assignment (66.6%). Novel Tx17 had the highest expression level (22.7%)  
434 of any *GATAD2A* isoform and skipped canonical exon 10 which overlaps a CpG island (212 nt,  
435 21.7% CpG) and contains a disordered, polar residue biased region and a phosphorylation site (Figure  
436 5E). Two additional novel isoforms (Txs 8 and 12), together accounting for 19.9% of expression,  
437 incorporated a known 89 nt 5'UTR exon (ENST00000494516) into full-length isoforms for the first  
438 time, clarifying the isoforms expressed from this gene.

439 Our results were also useful for several genes in identifying the probable isoforms represented by  
440 GENCODE transcript fragments. For the SZ risk gene clusterin (*CLU*), the novel Tx1 (COJ) extended  
441 ENST00000520796 to the canonical stop codon and suggested this isoform is moderately abundant  
442 (8.2% of TPM) across all brain tissues. The ASD risk gene microtubule associated protein tau  
443 (*MAPT*) novel Tx5 extended ENST00000703977 and further demonstrated that inclusion of canonical  
444 exon 7 (chr17:45,989,878-45,990,075) does not always exhibit coordinated splicing with canonical  
445 exon 5. This isoform had a moderate read count comprising 3.2% of *MAPT* expression.

446 The full RNA isoform profile for the SZ risk gene calcium voltage-gated channel subunit alpha 1 C  
447 (*CACNA1C*) has previously been reported and was repeated in this study [33]. In total, we identified 5  
448 annotated and 22 novel isoforms. The most highly expressed novel isoform identified in our previous  
449 study, novel 2199, now known as ENST00000682835.1 was also identified in our samples and  
450 exhibited similar cerebellar specific expression. Importantly, 10 novel isoforms replicated one of two  
451 alternative splicing events in a hotspot identified previously in canonical exon 7 [33]. This hotspot  
452 contains the canonical splice site and two alternative 3'SS acceptors over only 12 nucleotides (chr12:  
453 2,493,190-2,493,201) (Supplementary Figure 10).

454

455



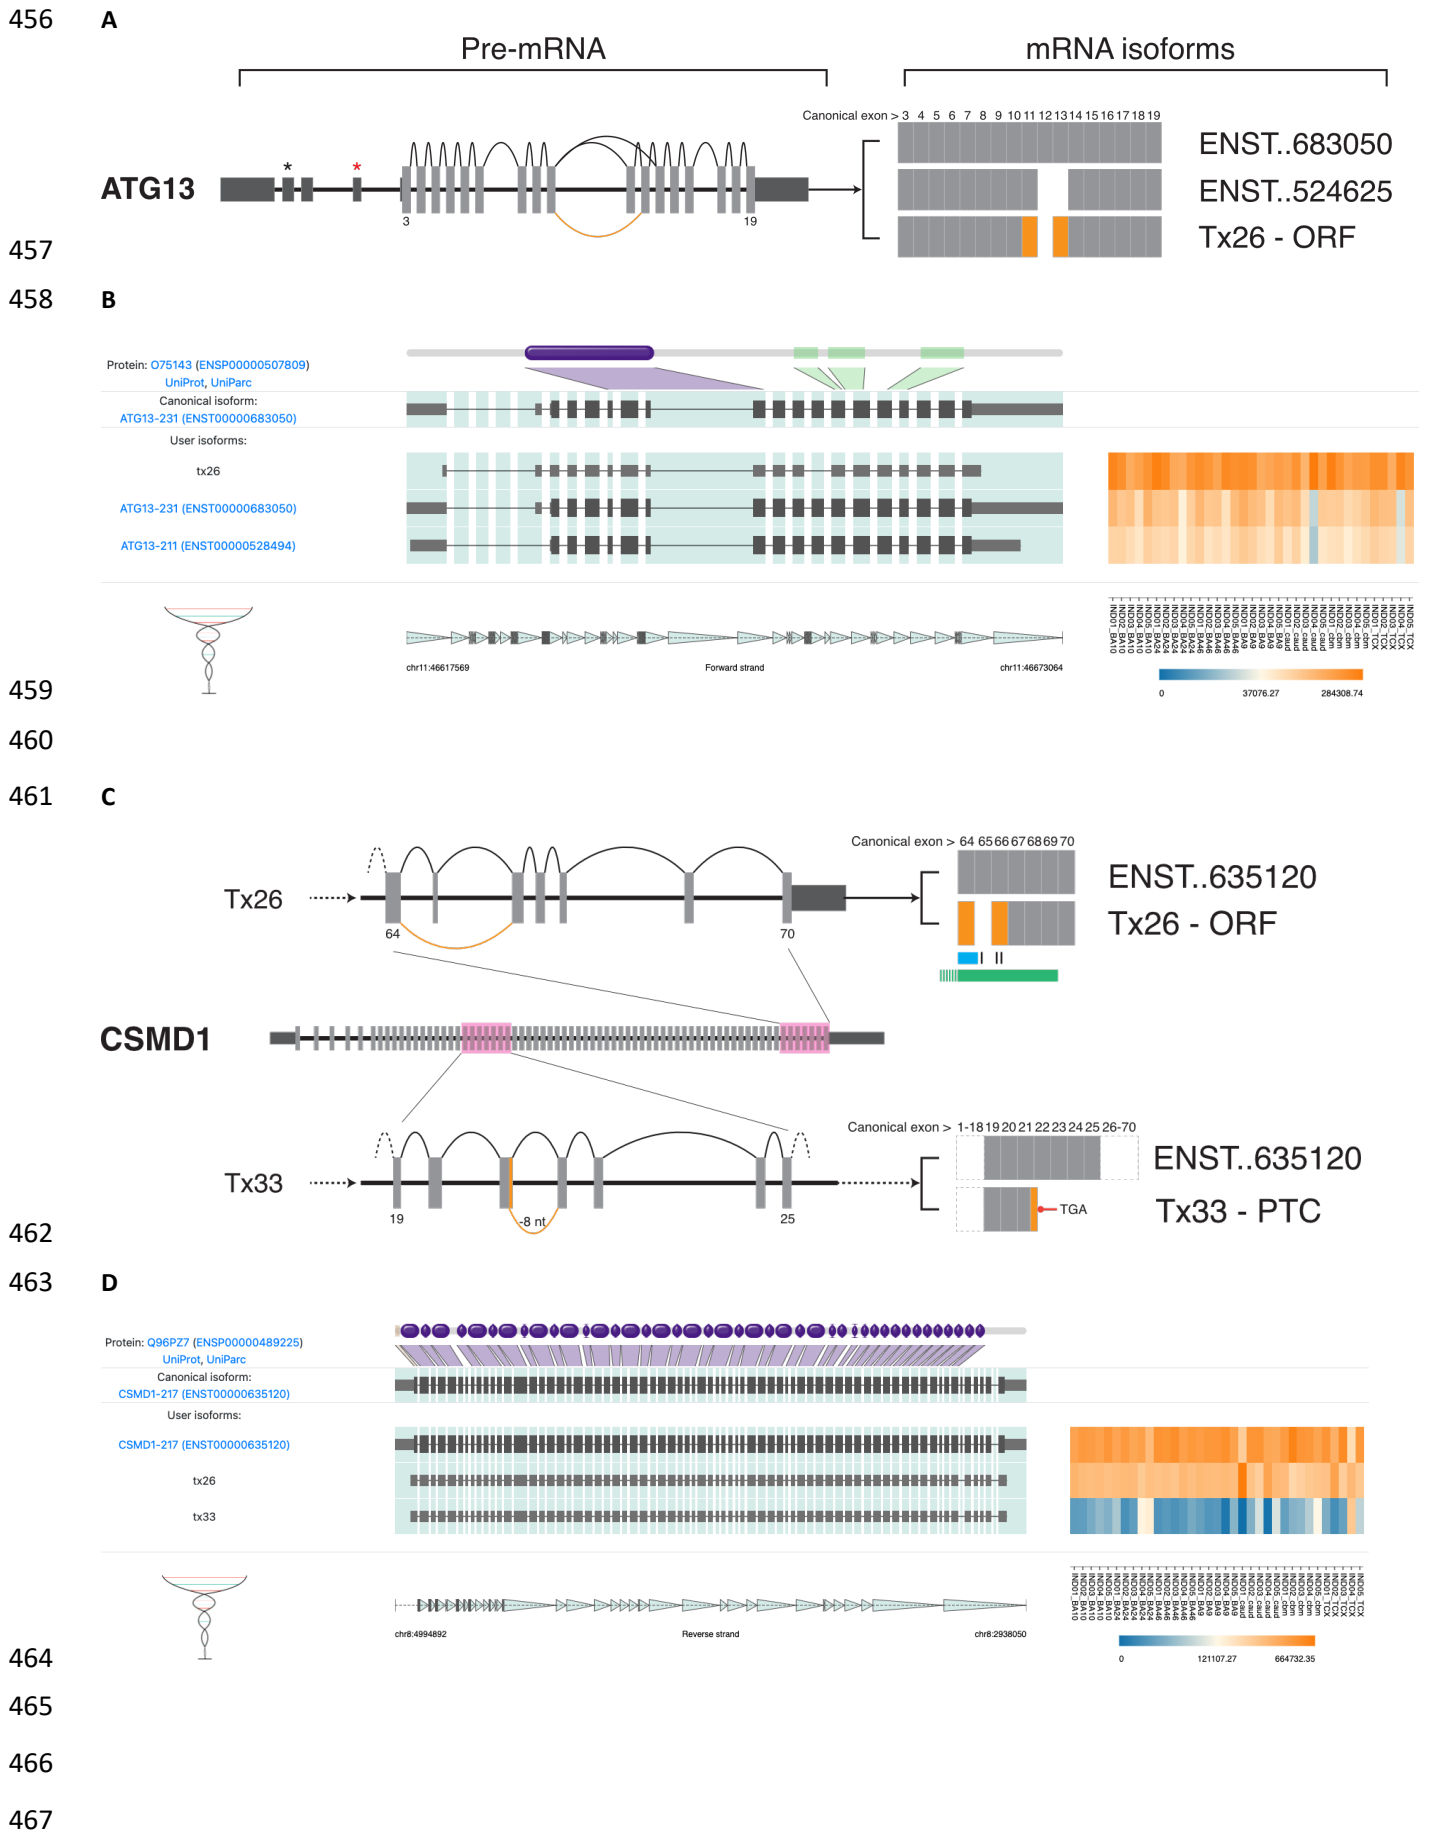

468 E

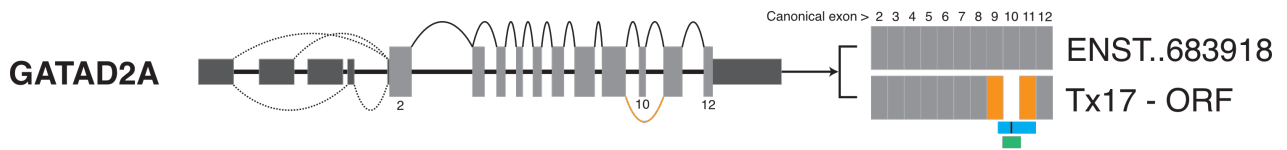

469  
470 **Figure 5. Highly abundant novel isoforms and the predicted mRNA outcome. (A,C,E)** mRNA splice graphs.  
471 Dark and light grey boxes indicate 5' and 3' UTR and coding exons respectively. Numbers indicate the coding  
472 exon. Orange lines (pre-mRNA) and boxes (mRNA) indicate novel splicing events. mRNA isoforms depict known  
473 isoforms (ENST) against novel (Tx) isoforms, “..” indicates abbreviated zeroes. **(B,D)** IsoVis visualisation of  
474 Isoform structures (centre stack) and expression levels (heatmap). Canonical isoform shown at top of stack  
475 including exonic mapping of protein domains (purple) and disordered regions (green) **A.** Splice graph of *ATG13*  
476 highlights the open reading frame (ORF) preserving skipping event of canonical exon 12. **B.** High expression of  
477 *ATG13* novel transcript 26 (Tx26). **C.** Splice graphs of *CSMD1* novel transcript 26 (Tx26) and 33 (Tx33) changes  
478 located within highlighted pink regions for clarity. The ORF retaining skipping event of canonical exon 65 may  
479 disrupt a known glycosylation site (black bar), a sushi domain extending from exon 64 (blue) and part of an  
480 extracellular domain (green). Tx33 contains a novel splice donor (-8 nt) within exon 21 leading to a premature  
481 termination codon (PTC) in exon 22. Dashed lines indicate continuation of the transcript to 5' or 3' coding  
482 exons. **D.** Relatively high expression of *CSMD1* novel transcripts 26 and 33. **E.** *GATAD2A* novel transcript Tx17  
483 contained a novel, ORF retaining, skipping event of canonical exon 10 which contains a phosphorylation site  
484 (black bar), part of a polar biased region (blue) and overlaps a CpG island (<300 bp, green). Dashed lines  
485 indicate alternative splicing of 5'UTR exons.

486

#### 487 **Novel isoforms alter predicted protein structures**

488 Novel isoforms have the potential to affect post-transcriptional regulation, protein sequence, structure  
489 and function or both. We next investigated a selection of isoforms that would be predicted to lead to  
490 protein changes to understand their possible impact.

491 Several novel isoforms (including 5 of the top 20 by expression, Supplementary File 3R) predicted a  
492 novel exon 22 skipping event in the SZ risk gene *ITIH4*. Targeted mass spectrophotometry confirmed  
493 a novel junction between exons 21 and 23 (ETLFSVMPG//PVLPGGALGISSIR) created due to  
494 skipping of exon 22 (Figure 6A). This event was predicted to encode a PTC <50 nt from the final  
495 exon junction, indicating it may not be directed to NMD. Protein structure prediction of the canonical  
496 (ENST00000266041.9) and a representative novel isoform (Tx71) indicated a loss of 106 aa (~44%)  
497 of the 35 kDa heavy chain domain but retention of three O-glycosylation sites (Thr:719, 720, 722)  
498 (Figure 6B-D). Novel transcript 71 accounted for ~3.7% of *ITIH4* TPM and this skipping event was  
499 found in an additional 24/68 (35.2%) novel isoforms which together accounted for 23.4% of reads.  
500 Tx71 also skipped canonical exons 15 and 16, which contain a protease susceptibility region (residues  
501 633 - 713) and a MASP-1 cleavage site (645 - 646: RR) [56]. Cleavage at this site and subsequent  
502 formation of an *ITIH4*-MASP complex can inhibit complement activation via the lectin pathway [56].  
503 However, skipping of canonical exon 22 was not mutually inclusive with skipping of exons 15/16 as  
504 other novel isoforms with exon 22 skipping retained exons 15/16. The absence of much of the 35 kDa  
505 heavy chain domain is likely to impact on *ITIH4* protein function and further studies will be required  
506 to examine if it plays a role in neuronal phenotypes.

507 Ten novel isoforms were identified for the SZ risk gene glutamate metabotropic receptor 3 (*GRM3*).  
508 Three novel isoforms (Txs 6, 7, 9) skip exon 2 which contains the canonical translation start site and  
509 instead could use an alternative, frame retaining, translation initiation site in exon 1, extending the  
510 truncated reference isoform ENST00000454217.1 which is also supported by human amygdala  
511 mRNA (AK294178) (Supplementary File 3Q). Translation of these isoforms would likely cause

512 significant disruption to the resultant protein with removal of the signal peptide, transmembrane  
513 domain and disulphide bonds. Cumulatively these novel isoforms accounted for a relatively low 8.8%  
514 of expression when compared to the canonical isoform (86.5%).

515 Both novel isoforms and exons were identified for the shared MDD and ASD risk gene neuronal  
516 growth regulator 1 (*NEGR1*). Most reads (83.5%) were assigned to the canonical *NEGR1* isoform  
517 (ENST00000357731, 354 aa). Three novel isoforms were identified, two of which (Tx1 and 2)  
518 contained novel exons (Supplementary Figure 11A, B). These transcripts accounted for 9.4% (Tx2)  
519 and 5% (Tx1) of read counts. Both novel exons were located between cassette exons 6 - 7 and were  
520 validated using Sanger sequencing. The novel exon within Tx1 was 42 nt (14 aa) in length, had high  
521 100 vertebrate conservation (UCSC) and was predicted to be frame retaining (Supplementary Figure  
522 11C). Protein structure prediction of the 368 aa Tx1 using AlphaFold [50] showed a 14 aa extension  
523 near the C-terminal prior between the GPI anchor (G:324 aa) and the three immunoglobulin-like  
524 domains (Supplementary Figure 11D). In contrast, the 58 nt novel exon within Tx2 encoded a PTC  
525 (TAG) only 35 nt distant to the final exon junction complex, suggesting it might not trigger NMD.  
526 Truncation of the protein at this position (313 + 7 novel aa) would remove the GPI anchor potentially  
527 creating a near complete protein (320 aa) that is unable to attach to the cell membrane (Supplementary  
528 Figure 11E).

529

### 530 **Brain region specific expression of novel isoforms**

531 Many isoforms have brain region enriched or specific expression [57, 58]. Our amplicon sequencing  
532 approach identifies the presence and relative expression proportion of different isoforms. We next  
533 asked if any novel risk genes isoforms showed expression differences between brain regions. Overall,  
534 cerebellum exhibited most differences in isoform expression, consistent with previous whole  
535 transcriptome results [12].

536 Depression risk gene DCC netrin 1 receptor (*DCC*) novel isoform Tx9 had significantly higher TPM  
537 in cerebellum (Figure 7A, Supplementary File 3J). TPMs of Tx9 in CBM were approximately 10x  
538 higher than the average for cortical regions and 3x higher than in caudate. This isoform, classified as a  
539 COJ and predicted to encode a 1425 aa protein, accounted for ~5% of *DCC* expression. Tx9 uses an  
540 alternative 3'SS (-60 nt) in cassette exon 17 and the skipped nucleotides cover an extracellular region  
541 and fibronectin type-III domain (UniProt). The SZ risk gene double C2 domain alpha (*DOC2A*) had  
542 two novel isoforms with significant variation in brain specific expression including Tx8 in cerebellum  
543 and Tx41 in caudate (Figure 7B, C, Supplementary File 3K). Novel Tx8 used a novel splice donor in  
544 canonical 5'UTR exon 1 (GT, +158 nt) and was predicted to encode a 400 aa protein unchanged from  
545 the canonical transcript. Tx41 was the only novel transcript that showed moderate but specific  
546 expression in caudate samples or any tissue other than cerebellum. Tx41 extends the known isoform  
547 ENST00000574405 to the canonical stop and is predicted to encode a 400 aa protein. Overall, 28  
548 novel isoforms in 11 risk genes were found to have variable expression amongst brain tissues  
549 supporting a role for these isoforms within specific brain regions or potentially in a subset of cells.

550

551 **A**

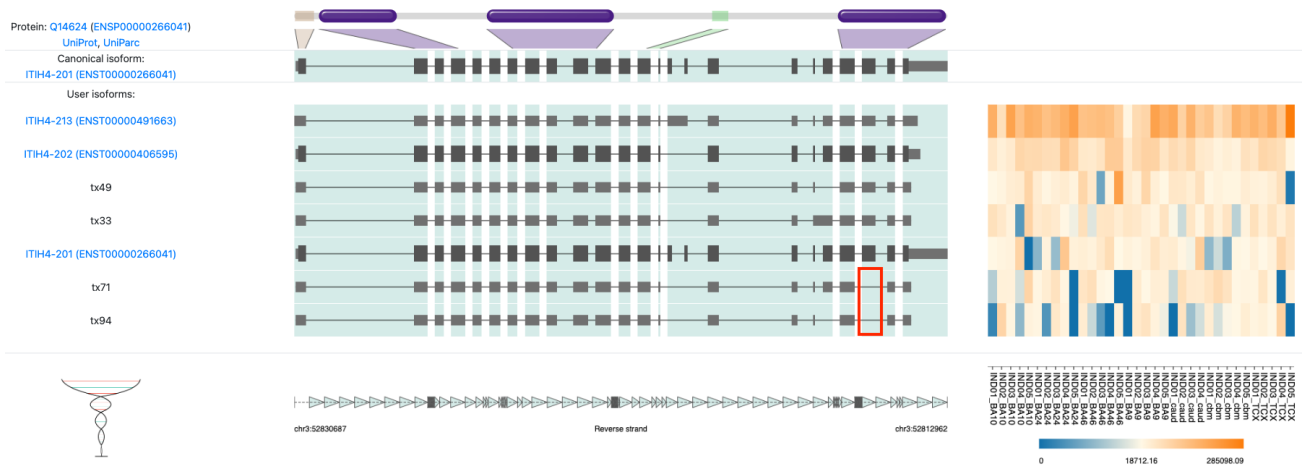

552

553 **B**

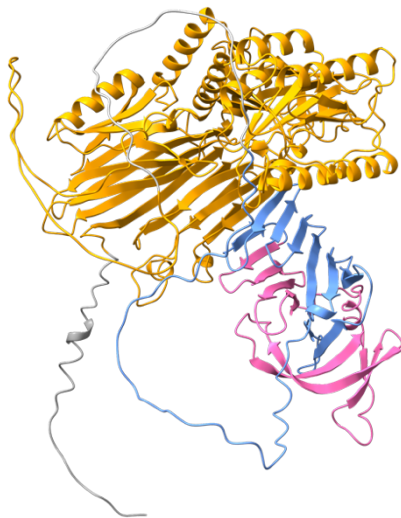

**C**

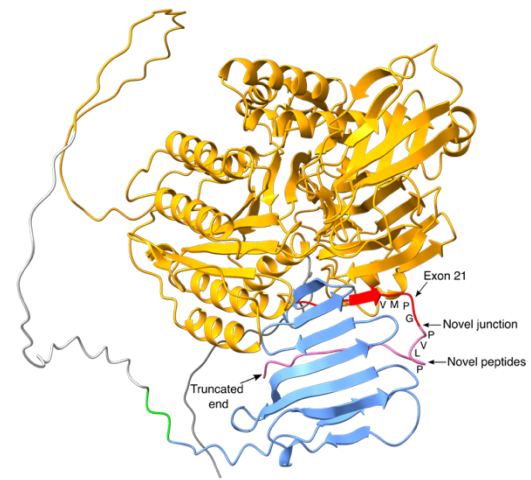

562 **D**

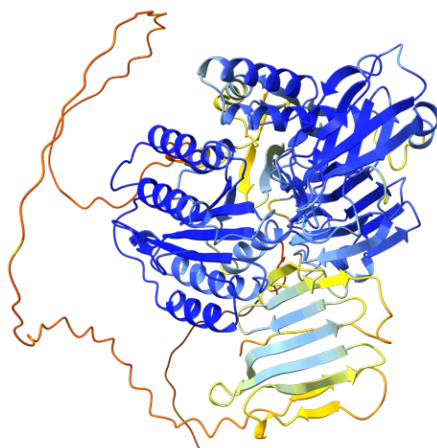

571

572 **Figure 6. *ITIH4* canonical and novel isoform protein structure predictions.** **A.** IsoVis stack of the top seven  
 573 *ITIH4* isoforms sorted by expression. Several novel isoforms contained the novel exon 22 skipping event (red  
 574 box) including Tx71 and 94. **B.** Canonical isoform (ENST00000266041, UniProt:Q14624) structure prediction  
 575 indicating 70 kDa (orange) and 30 kDa (blue) chains **C.** Novel isoform (Tx71) structure prediction indicating 70  
 576 kDa chain (orange), truncated 30 kDa chain (blue), O-glycosylation sites (green), novel splice junction peptide  
 577 detected using mass spectrophotometry (red) and novel peptides (pink). Black arrow indicates termination <50

578 nt from the final exon junction complex. **D.** AlphaFold per-residue confidence scores (pLDDT) (0-100) for *ITIH4*  
579 novel transcript 71: very high (>90, blue), confident (90-70, light-blue), low (70>50, yellow) and very low (<50,  
580 orange).

581

## 582 **Sequencing and validation of novel exons**

583 Our amplicon sequencing approach detected a total of 28 novel exons in 13 MHD risk genes. Using  
584 RT-PCR followed by Sanger sequencing we validated 21/21 targeted novel exons (Table 1). The SZ  
585 risk gene chloride voltage-gated channel 3 (*CLCN3*) contained four novel exons within six novel  
586 isoforms and an example of PCR validation is shown in Supplementary Figure 12A. Validated novel  
587 exon mean length was 99 nt, ranging from 41 nt (*CLCN3*) to 231 nt (*GRM3*). 16 (76%) of validated  
588 novel exons were classified as ‘poison exons’ as they encoded a PTC (Supplementary Figure 12B),  
589 although two of these poison exons, within *NEGR1* and *XRN2*, were <50 nt from the final exon  
590 junction and therefore may not undergo NMD. The novel exon contained within Tx3 for *XRN2* had  
591 the second highest isoform read count for the gene, following the canonical transcript  
592 (ENST0000037191), with 4.7% of assigned reads. If translated, this transcript would omit an omega-  
593 N-methylarginine modification site (ARG:946) within a disordered region at the C-terminus  
594 (Supplementary Figure 13, Supplementary File 3AE).

595 Three novel exons were in untranslated regions and two were predicted to retain the ORF, including  
596 the 42 nt exon in *NEGR1* mentioned previously and a 60 nt exon within *SORCS3*. *SORCS3* is a  
597 member of the VPS10 transmembrane protein family and assists with neuronal protein trafficking and  
598 sorting and a lack of *SORCS3* in the hippocampus in mice has been associated with impaired learning  
599 and fear memory in mice [59-61]. The novel exon in Tx1, encoding 20 aa  
600 (AMCGRAQWFTPVILALWETE), falls within the *SORCS3* luminal region (position:  
601 LYS:956/PRO:957) and did not appear to disrupt the transmembrane or cytoplasmic domains.  
602 Comparison of protein prediction models of the canonical (ENST00000369701.8) and novel isoform  
603 (Tx1) showed the addition of an unstructured loop with a partial alpha helix within the second  
604 polycystic kidney disease (PKD2) domain (Figure 8A-D), though the prediction confidence was low,  
605 so the structural impact on the PKD2 domain remains uncertain [52].

606



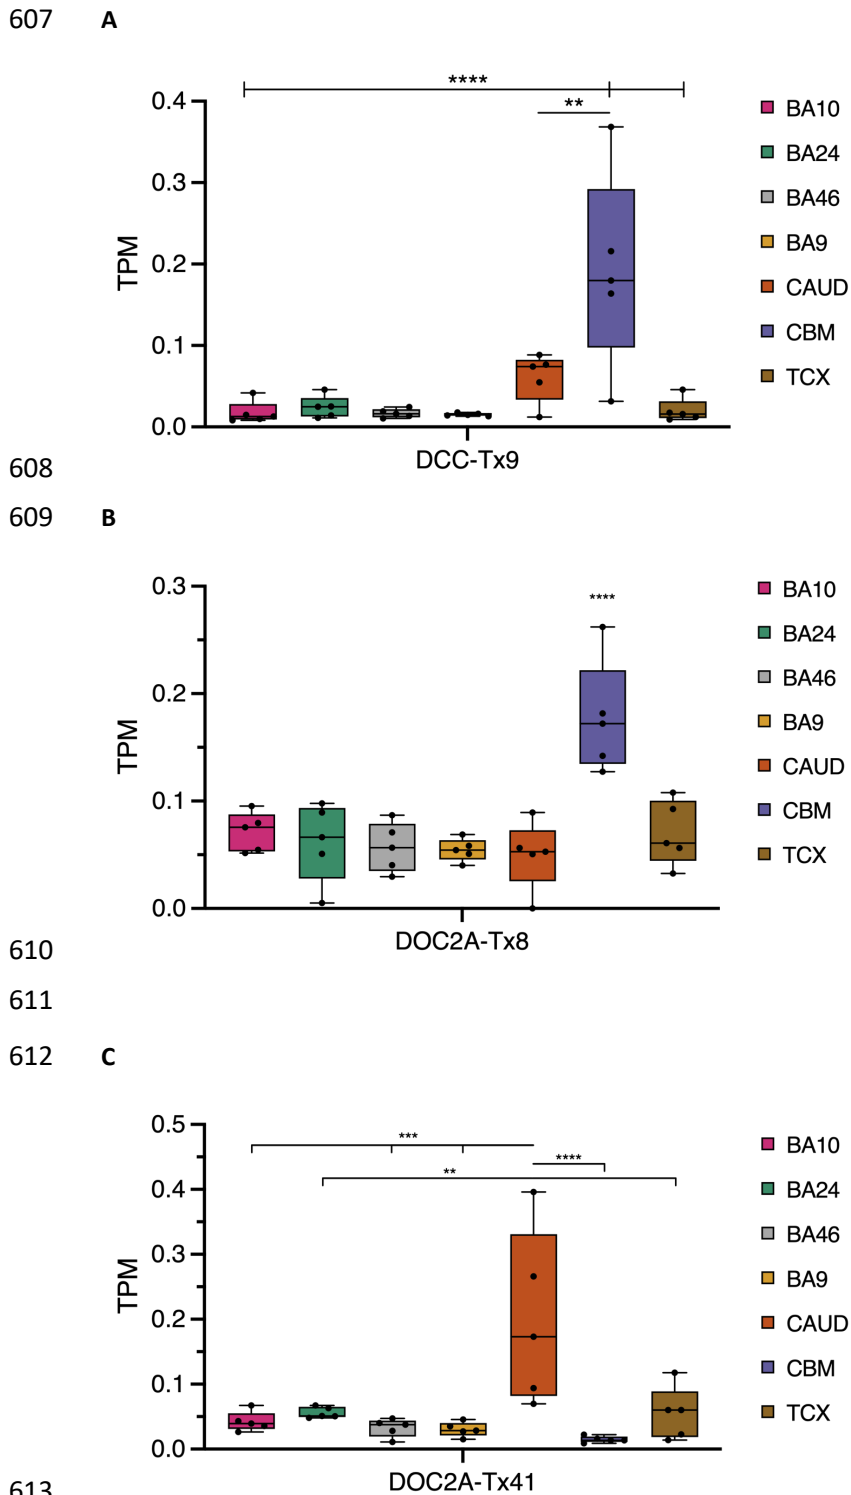



**Table 1.** Neuropsychiatric disorder risk gene novel exon validation.

*Definitions:* chromosome (Chr), nucleotide (nt), open reading frame (ORF), premature termination codon (PTC), untranslated region (UTR).

| Gene           | Novel exon | Chr | Genomic coordinates |           | Size (nt) | Classification | UniProt/Pfam domain  |
|----------------|------------|-----|---------------------|-----------|-----------|----------------|----------------------|
|                |            |     | Start               | End       |           |                |                      |
| <i>SORCS3</i>  | 20a        | 10  | 105244778           | 105244837 | 60        | ORF            | Luminal              |
| <i>GRIA1</i>   | 2a         | 5   | 153509750           | 153509806 | 57        | PTC            | Extracellular        |
| <i>XRN2</i>    | 16a        | 20  | 21345834            | 21345887  | 54        | PTC            | None                 |
| <i>XRN2</i>    | 29a        | 20  | 21387308            | 21387371  | 64        | PTC (<50nt)    | Disordered           |
| <i>SLC30A9</i> | 6a         | 4   | 42028140            | 42028260  | 121       | PTC            | Helix                |
| <i>SLC30A9</i> | 9a         | 4   | 42059964            | 42060036  | 73        | PTC            | Cation efflux family |
| <i>GRM3</i>    | 2a         | 7   | 86776784            | 86777014  | 231       | PTC            | None                 |
| <i>GRM3</i>    | 3a         | 7   | 86832296            | 86832411  | 116       | PTC            | None                 |
| <i>NEGR1</i>   | 6a         | 1   | 71532866            | 71532907  | 42        | ORF            | None                 |
| <i>NEGR1</i>   | 6b         | 1   | 71587343            | 71587400  | 58        | PTC (<50nt)    | Transmembrane        |
| <i>RFTN2</i>   | 1a         | 2   | 197654257           | 197654391 | 135       | PTC            | None                 |
| <i>RFTN2</i>   | 1b         | 2   | 197671542           | 197671664 | 123       | PTC            | None                 |
| <i>RFTN2</i>   | 6a         | 2   | 197616952           | 197617073 | 122       | PTC            | None                 |
| <i>CNTN4</i>   | 1a         | 3   | 2656485             | 2656587   | 103       | PTC            | None                 |
| <i>PTK2B</i>   | 3a         | 8   | 27318676            | 27318793  | 118       | UTR            | None                 |
| <i>PTK2B</i>   | 3a (short) | 8   | 27318696            | 27318793  | 98        | UTR            | None                 |
| <i>PTK2B</i>   | 3b         | 8   | 27319918            | 27319985  | 68        | UTR            | None                 |
| <i>CLCN3</i>   | 1a         | 4   | 169630165           | 169630335 | 171       | UTR            | None                 |
| <i>CLCN3</i>   | 2a         | 4   | 169638597           | 169638742 | 146       | PTC            | Cytoplasmic          |
| <i>CLCN3</i>   | 2b         | 4   | 169640168           | 169640208 | 41        | PTC            | Cytoplasmic          |
| <i>CLCN3</i>   | 2c         | 4   | 169663527           | 169663617 | 91        | PTC            | Cytoplasmic          |

637

## 638 Discussion

639 In this study we used long-read sequencing to profile 31 neuropsychiatric disorder risk genes  
640 identifying 360 novel RNA isoforms. We also present a new bioinformatic tool, IsoLamp, that can  
641 accurately identify and quantify novel RNA isoforms from long-read amplicon data. The recent  
642 proliferation of GWAS studies examining increasingly large population-wide data has identified  
643 hundreds of genomic variants associated with risk of developing a mental health disorder [23, 62].  
644 Evidence suggests that some risk variants, specifically those that are non-coding, play a role in pre-  
645 mRNA splicing and our current understanding of the transcriptomic profile for these risk genes is  
646 limited [33, 63]. A key finding of our research is both the high number of novel expressed RNA  
647 isoforms and, for some risk genes, the high expression of novel isoforms both individually and  
648 collectively. This finding reflects both the known complexity of alternative splicing in the human  
649 brain [64] and the current incompleteness of the reference transcriptome. As a result of the relatively  
650 deep sequencing afforded by this long-read approach, we have shown that there is a much higher level  
651 of RNA isoform diversity for these genes than reported in the current reference annotations. These  
652 findings provide new insight into the repertoire of RNA isoforms expressed in brain that could be  
653 important for understanding the risk and onset of neuropsychiatric disorders.

### 654 RNA isoform discovery, classification and visualisation

655 We generated a set of high-confidence RNA isoforms from nanopore long-read data using IsoLamp.  
656 IsoLamp optimises and streamlines transcript identification, quantification and annotation from long-  
657 read amplicon data and outperformed other methods. IsoLamp improves upon our previously  
658 published pipeline TAQLoRe [33] by expanding analysis capabilities to any gene and identifying all  
659 isoforms within a single pipeline. Our overall approach also overcomes the significant challenge of re-  
660 assembling and classifying RNA isoforms using short reads [65-67]. The primary outputs from  
661 IsoLamp, filtered transcripts (GTF) and transcript expression (TPM) is designed to be compatible  
662 with multiple downstream tools, including our visualisation tool IsoVis (<https://isomix.org/isovis>)  
663 (Wan et al., 2024, *under review*).

664 Taken together, our benchmarking results highlight that IsoLamp's optimised isoform discovery  
665 parameters, coupled with its specific filters (expression, overlapping primers, and full-length reads),  
666 yield significant improvements in both precision and recall compared to Bambu, FLAIR, FLAMES  
667 and StringTie2. The TPM filter applied to the data presented in this study is conservative and for long  
668 and complex genes may need to be tested to yield a balance of novel isoform detection and acceptable  
669 expression levels. IsoLamp also output consistent expression quantification that was robust to the  
670 quality of the annotations provided.

### 671 Novel RNA isoforms in neuropsychiatric disorders

672 The results presented in this study confirm our current limited understanding of RNA isoform profiles  
673 in the human brain and demonstrates how long-read sequencing technologies are a powerful tool to  
674 address this issue [32, 33, 68].

675 Several novel isoforms and exons were identified for ion homeostasis and channel genes *CLCN3*,  
676 *CACNA1C* and *SLC30A9* which have shared risk for SZ, BPD and ASD [21, 23, 62]. Voltage-gated  
677 ion channels are widely distributed in the brain and regulate neuronal firing. Mutations to these genes  
678 have been associated with disease and the emerging role of these channels in neuropsychiatric  
679 disorders has been previously reviewed [69]. A study of SZ, BPD and MDD patients versus controls  
680 reported gene expression changes in human striatum for potassium, calcium and chloride channel  
681 genes including *CACNA1C* and *CLCN3* [70]. *CLCN3* belongs to the CLC family of anion channels  
682 and transporters and has an established role in human neurodevelopment [71, 72]. We identified and  
683 validated four novel exons in *CLCN3*, three of which were predicted to encode a PTC which could  
684 lead to NMD. The fourth was located within the 5'UTR, an area known to impact translation

685 regulation in humans potentially through structural interference with the ribosome [73]. Splice  
686 variants of *CLCNC3* have been shown to impact intracellular localisation and our results confirmed  
687 these splice variants and further add to them, in particular a novel RNA isoform (Tx9) which is  
688 similar to ENST0000613795, but includes the 76 bp exon 12 [71]. Twenty-two novel isoforms were  
689 identified for calcium channel gene *CACNA1C* and supporting previous findings [33] the top ten  
690 novel isoforms, by assigned read count, were classified as frame retaining, supporting their potential  
691 to generate functional proteins. *SLC30A9* (first known as *HUEL*) encodes the zinc transporter protein  
692 9 (ZnT9) which is involved in zinc transport and homeostasis in the endoplasmic reticulum and also  
693 localises to the cytoplasm and nucleus [74]. Whilst the function of the protein is not fully understood,  
694 a 3 nt familial deletion (c.1047\_1049delGCA) in the highly conserved cation efflux domain (CED)  
695 has been recorded to result in changes to protein structure, intracellular zinc levels and intellectual  
696 disability [75, 76]. Critically, we identified and validated a novel exon (Tx3-9a:73 nt) within this CED  
697 providing evidence that this region may be alternatively spliced more commonly than previously  
698 understood, potentially impacting protein function [74].

699 Several novel exons were detected in the long reads for post-mortem brains used in this study.  
700 Previous studies have identified approximately 250 conserved neuronal micro-exons (3-27 nt) that  
701 typically preserve the ORF and are involved in neuronal differentiation [77, 78]. Although not  
702 classified as micro-exons, a third (N=7) of the validated novel exons found in post-mortem brain in  
703 our study were <65 nt, similar to previously reported exon lengths that are difficult for the splicing  
704 machinery to process, indicating that these exons may also be inefficiently spliced [79]. Micro-exons  
705 are known to be disrupted, usually through increased skipping events, in the brains of individuals with  
706 ASD [78, 80]. Importantly, we identified novel exons in two ASD risk genes, *SORCS3* and *XRN2*.  
707 *SORCS3*, which has remarkable shared neuropsychiatric disorder risk, contained a novel exon (22 aa)  
708 predicted to preserve the reading frame [59, 81]. How these novel exons impact expression or  
709 function of a mature protein remains unknown. Further studies with a focus on the transcriptional  
710 landscape in the developing brain will be crucial in furthering our understanding of these splicing  
711 events [80].

## 712 **Limitations and future directions**

713 The results of our study are limited by the sample size of available control post-mortem brain tissue.  
714 The nanopore long-read data for each risk gene was generated from five elderly, male control  
715 individuals, with a single female sample removed from further analyses due to quality constraints.  
716 These results may not be representative of all populations, particularly when it comes to novel exons  
717 and lowly expressed novel RNA isoforms. Individual transcriptome-wide variation has been observed  
718 between age, sex and pathology [82, 83], despite this we did not detect high levels of individual  
719 isoform expression variation and novel isoforms were almost always present in all individuals. The  
720 small number of available individuals means this dataset was not powered to investigate genotype  
721 impacts on isoform expression, though this will be an important area of investigation to determine  
722 which risk genotypes act through changes in isoform structure and/or expression.

723 Sample and RNA quality, as measured by RINe, is critical to high-quality sequencing and this is  
724 especially true for long reads [33, 84]. Supporting previous findings in mRNA, our data suggest that  
725 pH values <6.3 impacted the quality of post-mortem human brain RNA, which is especially critical  
726 for robust amplification of longer (>5 Kb) CDS [85]. In general, PCR cycling was kept as low as  
727 possible to avoid PCR bias towards shorter isoforms and other artifacts. However, we noted that lower  
728 RINs, as recorded for Ind04, appeared to impact amplicons of longer CDS. To help overcome such  
729 issues, future long-read amplicon sequencing could incorporate unique molecular identifiers to tag  
730 molecules prior to PCR to ensure an accurate representation of the original RNA isoforms [86].

731 The risk genes profiled in this study were selected based on multiple levels of evidence for their  
732 involvement in risk, not only from GWAS but from meta-analyses and further independent studies



733 [22, 25]. Whilst this approach was expected to produce a set of genes with high-confidence of their  
734 involvement in disorder risk, it is not exhaustive and it will be important to ensure risk gene lists are  
735 updated as more evidence from GWAS and other studies becomes available [25, 63]. Genes that are  
736 thought to confer resistance to the development of neuropsychiatric disease are also beginning to  
737 emerge and the addition investigation of their expression and isoform profiles may also provide  
738 valuable insight into disease risk and progression [87]. Additionally, combining whole or amplicon  
739 transcriptomic data, large-scale proteomic data and machine-learning predictive models like TRIFID  
740 can help to identify and prioritise functional proteomic isoforms [88].

## 741 **Conclusion**

742 In conclusion, we identified several hundred unreported RNA isoforms and novel exons, many of  
743 which could impact the function of known neuropsychiatric risk genes that also play crucial roles in  
744 normal neuronal development and activity. An understanding of the regulatory and functional impacts  
745 of these novel isoforms and incorporating long-read Nanopore data into existing repositories will help  
746 form an important knowledge base of alternative splicing in the human brain [89, 90]. Some novel  
747 isoforms or exons may also be future therapeutic targets through the modulation of splice isoforms  
748 using antisense oligonucleotides or CRISPR technology.

## 749 **Conflict of interest**

750 RDP, YP, YY, JG and MBC have received financial support from Oxford Nanopore Technologies  
751 (ONT) to present their findings at scientific conferences. ONT played no role in study design,  
752 execution, analysis or publication.

## 753 **Data availability**

754 All raw nanopore long-read data (fastq) generated for each of the genes reported in this manuscript  
755 will be uploaded to The European Genome-Phenome Archive (EGA) upon publication. Isoform GTFs  
756 and counts tables from IsoLamp analysis are available upon request. Scripts used for long-read data  
757 preparation and downstream data analysis are also available in supplementary material or upon  
758 request. IsoLamp is open source and freely available (<https://github.com/ClarkLaboratory/IsoLamp>).  
759 IsoVis is freely available (<https://isomix.org/isovis/>).

## 760 **Acknowledgements**

761 The authors would like to acknowledge that brain tissues were received from the Victorian Brain  
762 Bank (VBB), supported by The Florey, The Alfred and the Victorian Institute of Forensic Medicine  
763 and funded in part by Parkinson's Victoria, MND Victoria and FightMND. The authors would also  
764 like to thank Geoff Pavey at the VBB for his assistance with frozen tissue preparation. This research  
765 was supported by The University of Melbourne's Research Computing Services and the Petascale  
766 Campus Initiative.

## 767 References

- 768 1. Pan Q, Shai O, Lee LJ, Frey BJ, Blencowe BJ: **Deep surveying of alternative splicing**  
769 **complexity in the human transcriptome by high-throughput sequencing.** *Nature genetics*  
770 2008, **40**:1413-1415.
- 771 2. Kelemen O, Convertini P, Zhang Z, Wen Y, Shen M, Falaleeva M, Stamm S: **Function of**  
772 **alternative splicing.** *Gene* 2013, **514**:1-30.
- 773 3. Nilsen TW, Graveley BR: **Expansion of the eukaryotic proteome by alternative splicing.**  
774 *Nature* 2010, **463**:457-463.
- 775 4. Leung SK, Jeffries AR, Castanho I, Jordan BT, Moore K, Davies JP, Dempster EL, Bray NJ,  
776 O'Neill P, Tseng E: **Full-length transcript sequencing of human and mouse cerebral cortex**  
777 **identifies widespread isoform diversity and alternative splicing.** *Cell reports* 2021, **37**.
- 778 5. Mazin P, Xiong J, Liu X, Yan Z, Zhang X, Li M, He L, Somel M, Yuan Y, Phoebe Chen YP:  
779 **Widespread splicing changes in human brain development and aging.** *Molecular systems*  
780 *biology* 2013, **9**:633.
- 781 6. Baralle FE, Giudice J: **Alternative splicing as a regulator of development and tissue identity.**  
782 *Nature reviews Molecular cell biology* 2017, **18**:437-451.
- 783 7. De Paoli-Iseppi R, Gleeson J, Clark MB: **Isoform Age-Splice Isoform Profiling Using Long-**  
784 **Read Technologies.** *Frontiers in Molecular Biosciences* 2021, **8**.
- 785 8. Castaldi PJ, Abood A, Farber CR, Sheynkman GM: **Bridging the splicing gap in human**  
786 **genetics with long-read RNA sequencing: finding the protein isoform drivers of disease.**  
787 *Human Molecular Genetics* 2022, **31**:R123-R136.
- 788 9. Stanley RF, Abdel-Wahab O: **Dysregulation and therapeutic targeting of RNA splicing in**  
789 **cancer.** *Nature cancer* 2022, **3**:536-546.
- 790 10. Vitting-Seerup K, Sandelin A: **IsoformSwitchAnalyzeR: analysis of changes in genome-wide**  
791 **patterns of alternative splicing and its functional consequences.** *Bioinformatics* 2019,  
792 **35**:4469-4471.
- 793 11. Manuel JM, Guillo y N, Khatir I, Roucou X, Laurent B: **Re-evaluating the impact of alternative**  
794 **RNA splicing on proteomic diversity.** *Frontiers in Genetics* 2023, **14**:1089053.
- 795 12. Melé M, Ferreira PG, Reverter F, DeLuca DS, Monlong J, Sammeth M, Young TR, Goldmann  
796 JM, Pervouchine DD, Sullivan TJ: **The human transcriptome across tissues and individuals.**  
797 *Science* 2015, **348**:660-665.
- 798 13. Carvill GL, Engel KL, Ramamurthy A, Cochran JN, Roovers J, Stamberger H, Lim N, Schneider  
799 AL, Hollingsworth G, Holder DH: **Aberrant inclusion of a poison exon causes dravet**  
800 **syndrome and related SCN1A-associated genetic epilepsies.** *The American Journal of*  
801 *Human Genetics* 2018, **103**:1022-1029.
- 802 14. Lara-Pezzi E, Desco M, Gatto A, Gómez-Gaviro MV: **Neurogenesis: regulation by alternative**  
803 **splicing and related posttranscriptional processes.** *The Neuroscientist* 2017, **23**:466-477.
- 804 15. Rehm J, Shield KD: **Global Burden of Disease and the Impact of Mental and Addictive**  
805 **Disorders.** *Current Psychiatry Reports* 2019, **21**:10.
- 806 16. Sandell C, Kjellberg A, Taylor RR: **Participating in diagnostic experience: adults with**  
807 **neuropsychiatric disorders.** *Scandinavian Journal of Occupational Therapy* 2013, **20**:136-  
808 142.
- 809 17. Bray NJ, O'Donovan MC: **The genetics of neuropsychiatric disorders.** *Brain and neuroscience*  
810 *advances* 2018, **2**:2398212818799271.
- 811 18. Medalia A, Saperstein AM, Hansen MC, Lee S: **Personalised treatment for cognitive**  
812 **dysfunction in individuals with schizophrenia spectrum disorders.** *Neuropsychological*  
813 *rehabilitation* 2018, **28**:602-613.
- 814 19. Mora C, Zonca V, Riva MA, Cattaneo A: **Blood biomarkers and treatment response in major**  
815 **depression.** *Expert review of molecular diagnostics* 2018, **18**:513-529.
- 816 20. Anney RJL, Ripke S, Anttila V, Grove J, Holmans P, Huang H, Klei L, Lee PH, Medland SE, Neale  
817 B, et al: **Meta-analysis of GWAS of over 16,000 individuals with autism spectrum disorder**

- 818 **highlights a novel locus at 10q24.32 and a significant overlap with schizophrenia.**  
819 *Molecular Autism* 2017, **8**:21.
- 820 21. Grove J, Ripke S, Als TD, Mattheisen M, Walters RK, Won H, Pallesen J, Agerbo E, Andreassen  
821 OA, Anney R: **Identification of common genetic risk variants for autism spectrum disorder.**  
822 *Nature genetics* 2019, **51**:431-444.
- 823 22. Pardiñas AF, Holmans P, Pocklington AJ, Escott-Price V, Ripke S, Carrera N, Legge SE, Bishop  
824 S, Cameron D, Hamshere ML: **Common schizophrenia alleles are enriched in mutation-**  
825 **intolerant genes and in regions under strong background selection.** *Nature genetics* 2018,  
826 **50**:381.
- 827 23. Ripke S, Neale BM, Corvin A, Walters JT, Farh K-H, Holmans PA, Lee P, Bulik-Sullivan B, Collier  
828 DA, Huang H: **Biological insights from 108 schizophrenia-associated genetic loci.** *Nature*  
829 2014, **511**:421.
- 830 24. Stahl EA, Breen G, Forstner AJ, McQuillin A, Ripke S, Trubetskoy V, Mattheisen M, Wang Y,  
831 Coleman JR, Gaspar HA: **Genome-wide association study identifies 30 loci associated with**  
832 **bipolar disorder.** *Nature genetics* 2019, **51**:793-803.
- 833 25. Trubetskoy V, Pardiñas AF, Qi T, Panagiotaropoulou G, Awasthi S, Bigdeli TB, Bryois J, Chen  
834 C-Y, Dennison CA, Hall LS: **Mapping genomic loci implicates genes and synaptic biology in**  
835 **schizophrenia.** *Nature* 2022, **604**:502-508.
- 836 26. Zhu Z, Zhang F, Hu H, Bakshi A, Robinson MR, Powell JE, Montgomery GW, Goddard ME,  
837 Wray NR, Visscher PM: **Integration of summary data from GWAS and eQTL studies predicts**  
838 **complex trait gene targets.** *Nature genetics* 2016, **48**:481-487.
- 839 27. Sey NY, Hu B, Mah W, Fauni H, McAfee JC, Rajarajan P, Brennand KJ, Akbarian S, Won H: **A**  
840 **computational tool (H-MAGMA) for improved prediction of brain-disorder risk genes by**  
841 **incorporating brain chromatin interaction profiles.** *Nature Neuroscience* 2020, **23**:583-593.
- 842 28. Yang A, Chen J, Zhao X-M: **nMAGMA: a network-enhanced method for inferring risk genes**  
843 **from GWAS summary statistics and its application to schizophrenia.** *Briefings in*  
844 *bioinformatics* 2021, **22**:bbaa298.
- 845 29. Devlin B, Kelsoe JR, Sklar P, Daly MJ, O'Donovan MC, Craddock N, Sullivan PF, Smoller JW,  
846 Kendler KS: **Genetic relationship between five psychiatric disorders estimated from**  
847 **genome-wide SNPs.** *Nature genetics* 2013, **45**:984-994.
- 848 30. Steijger T, Abril JF, Engström PG, Kokocinski F, Hubbard TJ, Guigó R, Harrow J, Bertone P:  
849 **Assessment of transcript reconstruction methods for RNA-seq.** *Nature methods* 2013,  
850 **10**:1177-1184.
- 851 31. Amarasinghe SL, Su S, Dong X, Zappia L, Ritchie ME, Gouil Q: **Opportunities and challenges**  
852 **in long-read sequencing data analysis.** *Genome biology* 2020, **21**:1-16.
- 853 32. Glinos DA, Garborcauskas G, Hoffman P, Ehsan N, Jiang L, Gokden A, Dai X, Aguet F, Brown  
854 KL, Garimella K: **Transcriptome variation in human tissues revealed by long-read**  
855 **sequencing.** *Nature* 2022, **608**:353-359.
- 856 33. Clark MB, Wrzesinski T, Garcia AB, Hall NAL, Kleinman JE, Hyde T, Weinberger DR, Harrison  
857 PJ, Haerty W, Tunbridge EM: **Long-read sequencing reveals the complex splicing profile of**  
858 **the psychiatric risk gene CACNA1C in human brain.** *Molecular Psychiatry* 2020, **25**:37-47.
- 859 34. Ma L, Semick SA, Chen Q, Li C, Tao R, Price AJ, Shin JH, Jia Y, Consortium B, Brandon NJ:  
860 **Schizophrenia risk variants influence multiple classes of transcripts of sorting nexin 19**  
861 **(SNX19).** *Molecular psychiatry* 2020, **25**:831-843.
- 862 35. Buniello A, MacArthur JAL, Cerezo M, Harris LW, Hayhurst J, Malangone C, McMahon A,  
863 Morales J, Mountjoy E, Sollis E: **The NHGRI-EBI GWAS Catalog of published genome-wide**  
864 **association studies, targeted arrays and summary statistics 2019.** *Nucleic acids research*  
865 2019, **47**:D1005-D1012.
- 866 36. Nassar LR, Barber GP, Benet-Pagès A, Casper J, Clawson H, Diekhans M, Fischer C, Gonzalez  
867 JN, Hinrichs AS, Lee BT: **The UCSC genome browser database: 2023 update.** *Nucleic acids*  
868 *research* 2023, **51**:D1188-D1195.

- 869 37. Untergasser A, Nijveen H, Rao X, Bisseling T, Geurts R, Leunissen JA: **Primer3Plus, an**  
870 **enhanced web interface to Primer3.** *Nucleic acids research* 2007, **35**:W71-W74.
- 871 38. Raney BJ, Dreszer TR, Barber GP, Clawson H, Fujita PA, Wang T, Nguyen N, Paten B, Zweig  
872 AS, Karolchik D: **Track data hubs enable visualization of user-defined genome-wide**  
873 **annotations on the UCSC Genome Browser.** *Bioinformatics* 2014, **30**:1003-1005.
- 874 39. Kuhn RM, Haussler D, Kent WJ: **The UCSC genome browser and associated tools.** *Briefings in*  
875 *bioinformatics* 2013, **14**:144-161.
- 876 40. Bushnell B: **BBMap: a fast, accurate, splice-aware aligner.** Lawrence Berkeley National  
877 Lab.(LBNL), Berkeley, CA (United States); 2014.
- 878 41. Li H: **Minimap2: pairwise alignment for nucleotide sequences.** *Bioinformatics* 2018,  
879 **34**:3094-3100.
- 880 42. Chen Y, Sim A, Wan YK, Yeo K, Lee JJX, Ling MH, Love MI, Göke J: **Context-aware transcript**  
881 **quantification from long-read RNA-seq data with Bambu.** *Nature Methods* 2023:1-9.
- 882 43. Quinlan AR: **BEDTools: the Swiss-army tool for genome feature analysis.** *Current protocols*  
883 *in bioinformatics* 2014, **47**:11.12. 11-11.12. 34.
- 884 44. Pertea G, Pertea M: **GFF utilities: GffRead and GffCompare.** *F1000Research* 2020, **9**.
- 885 45. Patro R, Duggal G, Kingsford C: **Salmon: accurate, versatile and ultrafast quantification from**  
886 **RNA-seq data using lightweight-alignment.** 2015.
- 887 46. Patro R, Duggal G, Love MI, Irizarry RA, Kingsford C: **Salmon provides fast and bias-aware**  
888 **quantification of transcript expression.** *Nature methods* 2017, **14**:417-419.
- 889 47. Kovaka S, Zimin AV, Pertea GM, Razaghi R, Salzberg SL, Pertea M: **Transcriptome assembly**  
890 **from long-read RNA-seq alignments with StringTie2.** *Genome biology* 2019, **20**:1-13.
- 891 48. Tang AD, Soulette CM, van Baren MJ, Hart K, Hrabeta-Robinson E, Wu CJ, Brooks AN: **Full-**  
892 **length transcript characterization of SF3B1 mutation in chronic lymphocytic leukemia**  
893 **reveals downregulation of retained introns.** *Nature communications* 2020, **11**:1438.
- 894 49. Ye J, Coulouris G, Zaretskaya I, Cutcutache I, Rozen S, Madden TL: **Primer-BLAST: a tool to**  
895 **design target-specific primers for polymerase chain reaction.** *BMC bioinformatics* 2012,  
896 **13**:1-11.
- 897 50. Jumper J, Evans R, Pritzel A, Green T, Figurnov M, Ronneberger O, Tunyasuvunakool K, Bates  
898 R, Žídek A, Potapenko A: **Highly accurate protein structure prediction with AlphaFold.**  
899 *Nature* 2021, **596**:583-589.
- 900 51. Pettersen EF, Goddard TD, Huang CC, Meng EC, Couch GS, Croll TI, Morris JH, Ferrin TE: **UCSF**  
901 **ChimeraX: Structure visualization for researchers, educators, and developers.** *Protein*  
902 *Science* 2021, **30**:70-82.
- 903 52. Mirdita M, Schütze K, Moriwaki Y, Heo L, Ovchinnikov S, Steinegger M: **ColabFold: making**  
904 **protein folding accessible to all.** *Nature methods* 2022, **19**:679-682.
- 905 53. Tian L, Jabbari JS, Thijssen R, Gouil Q, Amarasinghe SL, Voogd O, Kariyawasam H, Du MR,  
906 Schuster J, Wang C: **Comprehensive characterization of single-cell full-length isoforms in**  
907 **human and mouse with long-read sequencing.** *Genome biology* 2021, **22**:1-24.
- 908 54. Tardaguila M, De La Fuente L, Marti C, Pereira C, Pardo-Palacios FJ, Del Risco H, Ferrell M,  
909 Mellado M, Macchietto M, Verheggen K: **SQANTI: extensive characterization of long-read**  
910 **transcript sequences for quality control in full-length transcriptome identification and**  
911 **quantification.** *Genome research* 2018, **28**:396-411.
- 912 55. Gasteiger E, Gattiker A, Hoogland C, Ivanyi I, Appel RD, Bairoch A: **ExpASY: the proteomics**  
913 **server for in-depth protein knowledge and analysis.** *Nucleic acids research* 2003, **31**:3784-  
914 3788.
- 915 56. Pihl R, Jensen RK, Poulsen EC, Jensen L, Hansen AG, Thøgersen IB, Dobó J, Gál P, Andersen  
916 GR, Enghild JJ: **ITIH4 acts as a protease inhibitor by a novel inhibitory mechanism.** *Science*  
917 *advances* 2021, **7**:eaba7381.



- 918 57. Schreiner D, Nguyen T-M, Russo G, Heber S, Patrignani A, Ahrné E, Scheiffle P: **Targeted**  
919 **combinatorial alternative splicing generates brain region-specific repertoires of neurexins.**  
920 *Neuron* 2014, **84**:386-398.
- 921 58. Joglekar A, Prjibelski A, Mahfouz A, Collier P, Lin S, Schlusche AK, Marrocco J, Williams SR,  
922 Haase B, Hayes A, et al: **A spatially resolved brain region- and cell type-specific isoform**  
923 **atlas of the postnatal mouse brain.** *Nature Communications* 2021, **12**:463.
- 924 59. Kamran M, Laighneach A, Bibi F, Donohoe G, Ahmed N, Rehman AU, Morris DW:  
925 **Independent Associated SNPs at SORCS3 and Its Protein Interactors for Multiple Brain-**  
926 **Related Disorders and Traits.** *Genes* 2023, **14**:482.
- 927 60. Dong F, Wu C, Jiang W, Zhai M, Li H, Zhai L, Zhang X: **Cryo-EM structure studies of the**  
928 **human VPS10 domain-containing receptor SorCS3.** *Biochemical and Biophysical Research*  
929 *Communications* 2022, **624**:89-94.
- 930 61. Breiderhoff T, Christiansen GB, Pallesen LT, Vaegter C, Nykjaer A, Holm MM, Glerup S,  
931 Willnow TE: **Sortilin-related receptor SORCS3 is a postsynaptic modulator of synaptic**  
932 **depression and fear extinction.** *PLoS one* 2013, **8**:e75006.
- 933 62. Mullins N, Forstner AJ, O'Connell KS, Coombes B, Coleman JR, Qiao Z, Als TD, Bigdeli TB,  
934 Børte S, Bryois J: **Genome-wide association study of more than 40,000 bipolar disorder**  
935 **cases provides new insights into the underlying biology.** *Nature genetics* 2021, **53**:817-829.
- 936 63. Kim M, Vo DD, Jops CT, Wen C, Patowary A, Bhattacharya A, Yap CX, Zhou H, Gandal MJ:  
937 **Multivariate variance components analysis uncovers genetic architecture of brain isoform**  
938 **expression and novel psychiatric disease mechanisms.** *medRxiv* 2022:2022.2010.  
939 2018.22281204.
- 940 64. Yeo G, Holste D, Kreiman G, Burge CB: **Variation in alternative splicing across human**  
941 **tissues.** *Genome biology* 2004, **5**:1-15.
- 942 65. Sarantopoulou D, Brooks TG, Nayak S, Mrčela A, Lahens NF, Grant GR: **Comparative**  
943 **evaluation of full-length isoform quantification from RNA-Seq.** *BMC bioinformatics* 2021,  
944 **22**:1-24.
- 945 66. Hu Y, Fang L, Chen X, Zhong JF, Li M, Wang K: **LIQA: long-read isoform quantification and**  
946 **analysis.** *Genome biology* 2021, **22**:182.
- 947 67. Zhang C, Zhang B, Lin L-L, Zhao S: **Evaluation and comparison of computational tools for**  
948 **RNA-seq isoform quantification.** *BMC genomics* 2017, **18**:1-11.
- 949 68. Arendt-Tranholm A, Mwirigi JM, Price TJ: **RNA isoform expression landscape of the human**  
950 **dorsal root ganglion (DRG) generated from long read sequencing.** *bioRxiv* 2023:2023.2010.  
951 2028.564535.
- 952 69. Imbrici P, Conte Camerino D, Tricarico D: **Major channels involved in neuropsychiatric**  
953 **disorders and therapeutic perspectives.** *Frontiers in Genetics* 2013, **4**.
- 954 70. Smolin B, Karry R, Gal-Ben-Ari S, Ben-Shachar D: **Differential expression of genes encoding**  
955 **neuronal ion-channel subunits in major depression, bipolar disorder and schizophrenia:**  
956 **implications for pathophysiology.** *International Journal of Neuropsychopharmacology* 2012,  
957 **15**:869-882.
- 958 71. Guzman RE, Miranda-Laferte E, Franzen A, Fahlke C: **Neuronal CIC-3 splice variants differ in**  
959 **subcellular localizations, but mediate identical transport functions.** *Journal of Biological*  
960 *Chemistry* 2015, **290**:25851-25862.
- 961 72. Duncan AR, Polovitskaya MM, Gaitán-Peñas H, Bertelli S, VanNoy GE, Grant PE, O'Donnell-  
962 Luria A, Valivullah Z, Lovgren AK, England EM: **Unique variants in CLCN3, encoding an**  
963 **endosomal anion/proton exchanger, underlie a spectrum of neurodevelopmental**  
964 **disorders.** *The American Journal of Human Genetics* 2021, **108**:1450-1465.
- 965 73. Leppek K, Das R, Barna M: **Functional 5' UTR mRNA structures in eukaryotic translation**  
966 **regulation and how to find them.** *Nature reviews Molecular cell biology* 2018, **19**:158-174.



- 967 74. Roca-Umbert A, Garcia-Calleja J, Vogel-González M, Fierro-Villegas A, Ill-Raga G, Herrera-  
968 Fernández V, Bosnjak A, Muntané G, Gutiérrez E, Campelo F: **Human genetic adaptation**  
969 **related to cellular zinc homeostasis.** *Plos Genetics* 2023, **19**:e1010950.
- 970 75. Perez Y, Shorer Z, Liani-Leibson K, Chabosseau P, Kadir R, Volodarsky M, Halperin D, Barber-  
971 Zucker S, Shalev H, Schreiber R: **SLC30A9 mutation affecting intracellular zinc homeostasis**  
972 **causes a novel cerebro-renal syndrome.** *Brain* 2017, **140**:928-939.
- 973 76. Willekens J, Runnels LW: **Impact of Zinc Transport Mechanisms on Embryonic and Brain**  
974 **Development.** *Nutrients* 2022, **14**:2526.
- 975 77. Gonatopoulos-Pournatzis T, Blencowe BJ: **Microexons: at the nexus of nervous system**  
976 **development, behaviour and autism spectrum disorder.** *Current Opinion in Genetics &*  
977 *Development* 2020, **65**:22-33.
- 978 78. Irimia M, Weatheritt RJ, Ellis JD, Parikshak NN, Gonatopoulos-Pournatzis T, Babor M,  
979 Quesnel-Vallières M, Tapial J, Raj B, O'Hanlon D: **A highly conserved program of neuronal**  
980 **microexons is misregulated in autistic brains.** *Cell* 2014, **159**:1511-1523.
- 981 79. Li Yi, Sanchez-Pulido L, Haerty W, Ponting CP: **RBFOX and PTBP1 proteins regulate the**  
982 **alternative splicing of micro-exons in human brain transcripts.** *Genome research* 2015,  
983 **25**:1-13.
- 984 80. Chau KK, Zhang P, Urresti J, Amar M, Pramod AB, Chen J, Thomas A, Corominas R, Lin GN,  
985 lakoucheva LM: **Full-length isoform transcriptome of the developing human brain provides**  
986 **further insights into autism.** *Cell reports* 2021, **36**.
- 987 81. Wu Y, Cao H, Baranova A, Huang H, Li S, Cai L, Rao S, Dai M, Xie M, Dou Y: **Multi-trait**  
988 **analysis for genome-wide association study of five psychiatric disorders.** *Translational*  
989 *psychiatry* 2020, **10**:209.
- 990 82. Peters MJ, Joehanes R, Pilling LC, Schurmann C, Conneely KN, Powell J, Reinmaa E, Sutphin  
991 GL, Zhernakova A, Schramm K: **The transcriptional landscape of age in human peripheral**  
992 **blood.** *Nature communications* 2015, **6**:1-14.
- 993 83. Işıldak U, Somel M, Thornton JM, Dönertaş HM: **Temporal changes in the gene expression**  
994 **heterogeneity during brain development and aging.** *Scientific reports* 2020, **10**:4080.
- 995 84. Prawer YD, Gleeson J, De Paoli-Iseppi R, Clark MB: **Pervasive effects of RNA degradation on**  
996 **Nanopore direct RNA sequencing.** *NAR Genomics and Bioinformatics* 2023, **5**:lqad060.
- 997 85. Harrison PJ, Heath PR, Eastwood SL, Burnet PWJ, McDonald B, Pearson RCA: **The relative**  
998 **importance of premortem acidosis and postmortem interval for human brain gene**  
999 **expression studies: selective mRNA vulnerability and comparison with their encoded**  
1000 **proteins.** *Neuroscience Letters* 1995, **200**:151-154.
- 1001 86. Karst SM, Ziels RM, Kirkegaard RH, Sørensen EA, McDonald D, Zhu Q, Knight R, Albertsen M:  
1002 **High-accuracy long-read amplicon sequences using unique molecular identifiers with**  
1003 **Nanopore or PacBio sequencing.** *Nature methods* 2021, **18**:165-169.
- 1004 87. Hess JL, Tylee DS, Mattheisen M, Børglum AD, Als TD, Grove J, Werge T, Mortensen PB: **A**  
1005 **polygenic resilience score moderates the genetic risk for schizophrenia.** *Molecular*  
1006 *psychiatry* 2021, **26**:800-815.
- 1007 88. Pozo F, Martinez-Gomez L, Walsh TA, Rodriguez JM, Di Domenico T, Abascal F, Vazquez J,  
1008 Tress ML: **Assessing the functional relevance of splice isoforms.** *NAR Genomics and*  
1009 *Bioinformatics* 2021, **3**:lqab044.
- 1010 89. Dawes R, Bournazos AM, Bryen SJ, Bommireddipalli S, Marchant RG, Joshi H, Cooper ST:  
1011 **SpliceVault predicts the precise nature of variant-associated mis-splicing.** *Nature Genetics*  
1012 2023, **55**:324-332.
- 1013 90. Frankish A, Carbonell-Sala S, Diekhans M, Jungreis I, Loveland JE, Mudge JM, Sisu C, Wright  
1014 JC, Arnan C, Barnes I: **GENCODE: reference annotation for the human and mouse genomes**  
1015 **in 2023.** *Nucleic acids research* 2023, **51**:D942-D949.
- 1016 91. Lonsdale J, Thomas J, Salvatore M, Phillips R, Lo E, Shad S, Hasz R, Walters G, Garcia F, Young  
1017 N: **The genotype-tissue expression (GTEx) project.** *Nature genetics* 2013, **45**:580-585.

1018

1019

1020 **Supplementary Figures**

1021

1022 **Supplementary Figure 1. Mental health disorder (MHD) risk gene list curation pipeline. A.**  
 1023 Single nucleotide polymorphism (SNP) catalogues form the foundation of the final risk gene evidence  
 1024 lists used to select genes for amplicon sequencing. These catalogues are collated from up-to-date,  
 1025 large-scale genome wide association studies (GWAS) of MHDs. A single GWAS catalogue was  
 1026 downloaded for schizophrenia (SZ), major depressive disorder (MDD), bipolar disorder (BD) and  
 1027 autism spectrum disorder (ASD), and associations were filtered according to criteria in Supplementary  
 1028 Table 2. GWAS data generally had either a mapped or reported gene associated with each SNP.  
 1029 Further evidence (i.e. reported genes) from categorised literature sources (shown in green) was then  
 1030 added to the list. This list was then sorted (high to low) by the number of occurrences of a risk gene in  
 1031 unique studies across all evidence/validation categories. No weighting was applied to any category. A  
 1032 multi-trait list was also made containing evidence for risk genes across all four MHDs so shared risk  
 1033 genes could be identified. **B.** An example of additional risk gene information included in the list e.g.  
 1034 for *GNL3*, count of known transcripts, count of coding exons for the canonical isoform, length in  
 1035 nucleotides (nt), length of protein in amino acids (aa) and the categorised Genotype-Tissue  
 1036 Expression (GTEx) in transcript per million (TPM) for each brain tissue [91]. *Definitions:* multi-  
 1037 marker analysis of Genomic annotation (MAGMA), summary-based Mendelian randomisation  
 1038 (SMR), transcriptome wide association study (TWAS).

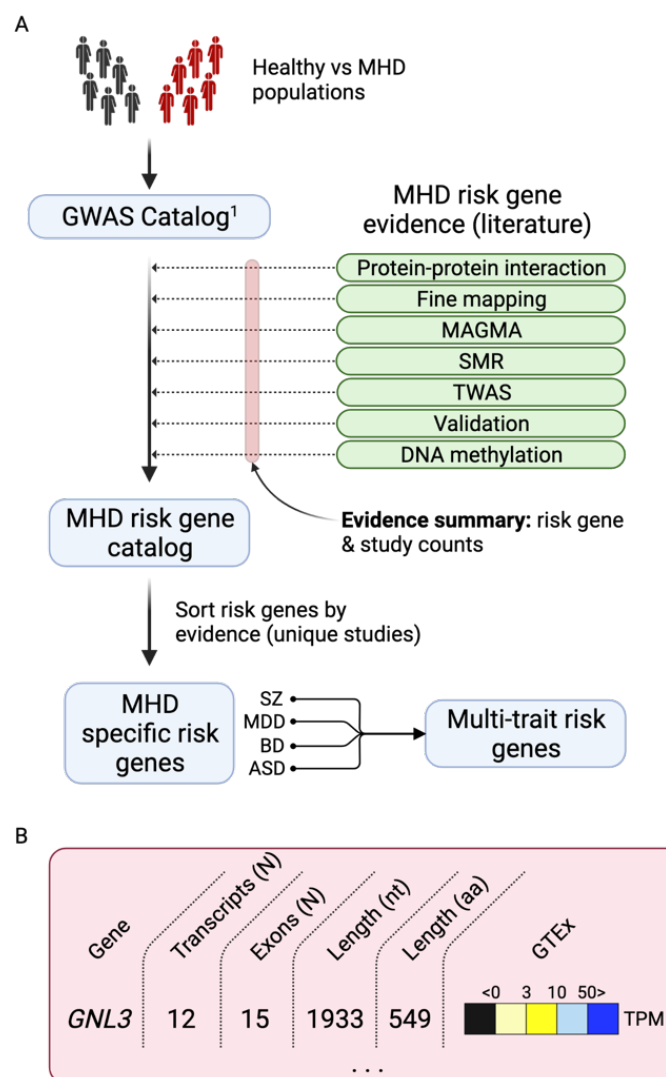

1039 **Supplementary Figure 2.** Experimental design of SIRV amplicon controls. E0, E1 and E2 represent  
1040 each SIRV mix of known isoform concentrations. Each mix was converted into cDNA in triplicate  
1041 and finally, the full length of synthetic genes SIRV5 and 6 were amplified using PCR in triplicate for  
1042 each cDNA replicate.

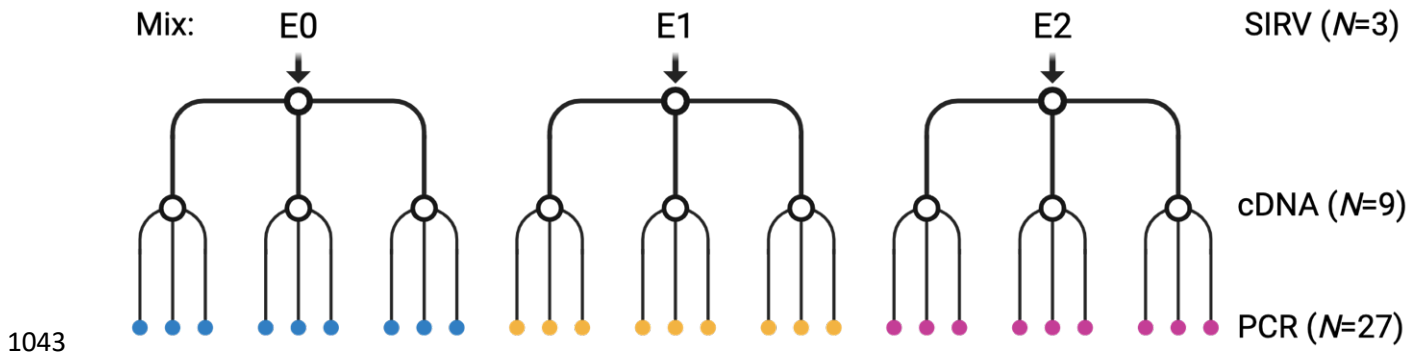

1044 **Supplementary Figure 3. Benchmarking IsoLamp using spike-in SIRVs and the optimised**  
 1045 **IsoLamp expression-based filter. A.** Precision recall of each tested pipeline with the complete,  
 1046 insufficient or over annotated SIRV reference, filtering all results using the IsoLamp expression-based  
 1047 filter. IsoLamp (black) returned high quality isoforms from amplicon data of both SIRV5 and 6.  
 1048 Pearson **(B)** and Spearman **(C)** correlations for each pipeline between known and observed expression  
 1049 values for SIRV 5 and 6 mixes.

1050

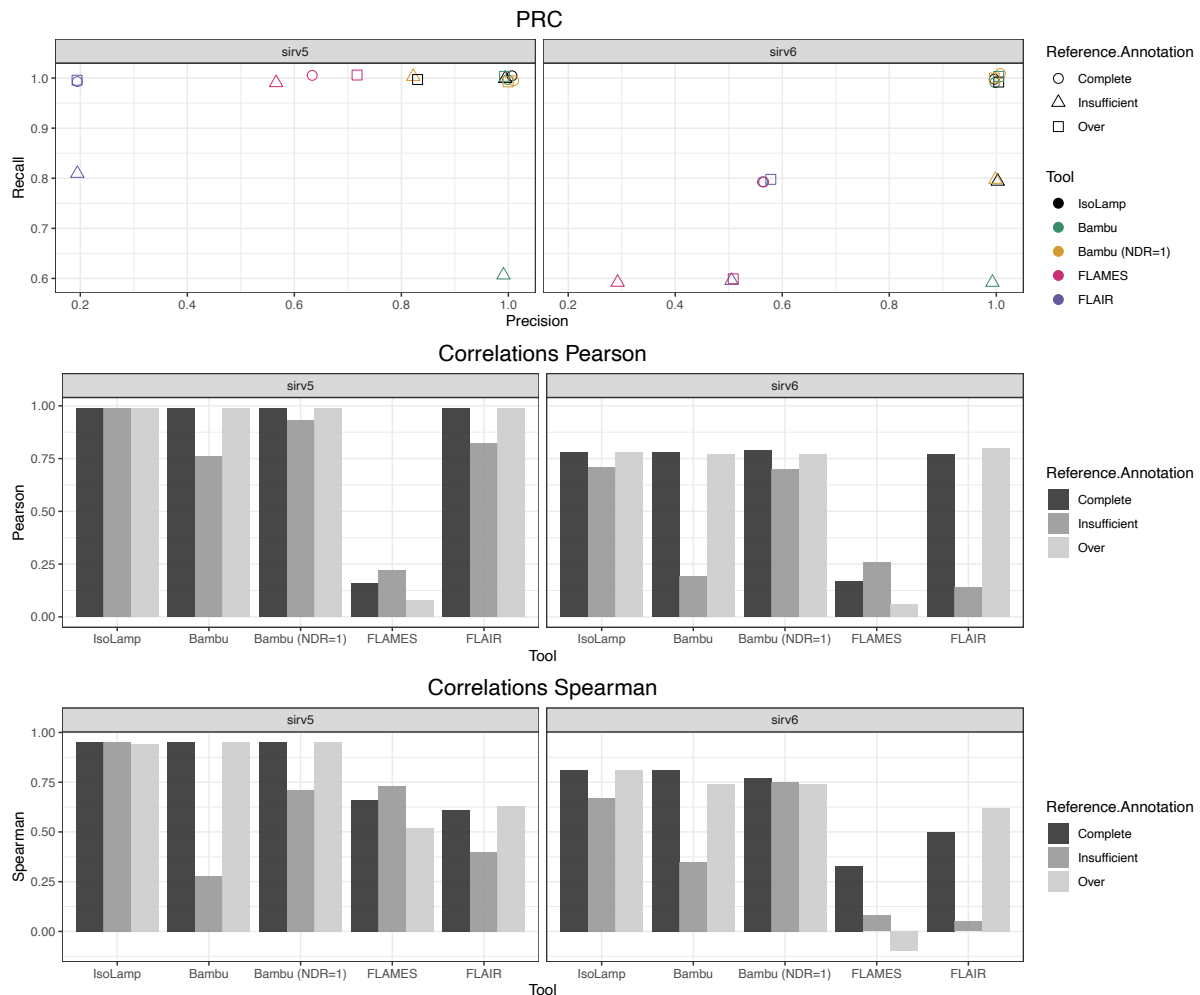

1051



1052 **Supplementary Figure 4. Post-mortem human brain RNA QC.** **A.** Yield of isolated total  
1053 RNA generally increases with increased tissue weight (mg) input to homogenisation using the  
1054 RNeasy Lipid Tissue Mini Kit (QIAGEN:74804). **B.** The RNA integrity number equivalent  
1055 (RINe) for brain tissue was generally between 7 – 8. RINe from individual (Ind) 04 was  
1056 significantly lower when compared to Individuals 01 and 05. **C.** No correlation was detected  
1057 between RNA quality (RINe) and individual post-mortem interval (PMI). **D.** Decreasing  
1058 individual brain pH appears to impact RINe. Half-circles indicate samples from individual 04  
1059 (pH = 6.3). Full circles indicate degraded RNA isolated from individual 06 which were not  
1060 included for further analysis. Data in B, C and D are staggered for clarity.

1061 **A**

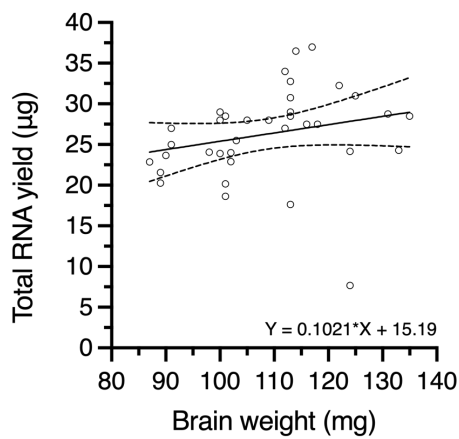

**B**

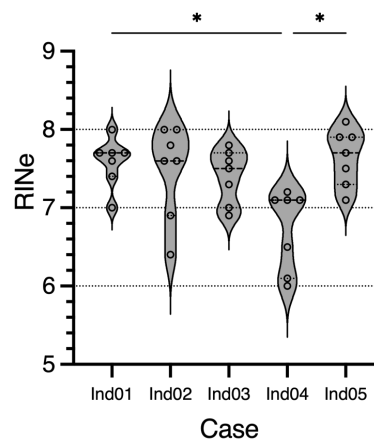

1062 **C**

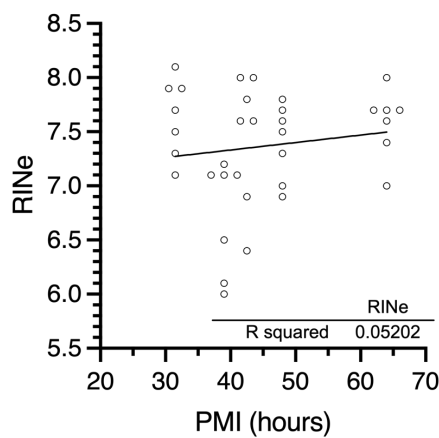

**D**

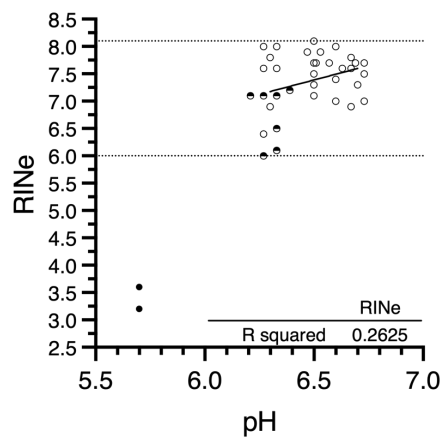

1063

1064 **Supplementary Figure 5. Principal component analyses (PCA) of brain samples.** PC1 and PC2  
1065 coloured by RNA integrity (RIN) (A) and brain region (B). C. PC4 and PC5 coloured by donor age  
1066 (years). Key: individual (ind), Brodmann's area (BA), caudate (caud), cerebellum (cbm) and temporal  
1067 cortex (TCX).

1068 **A**

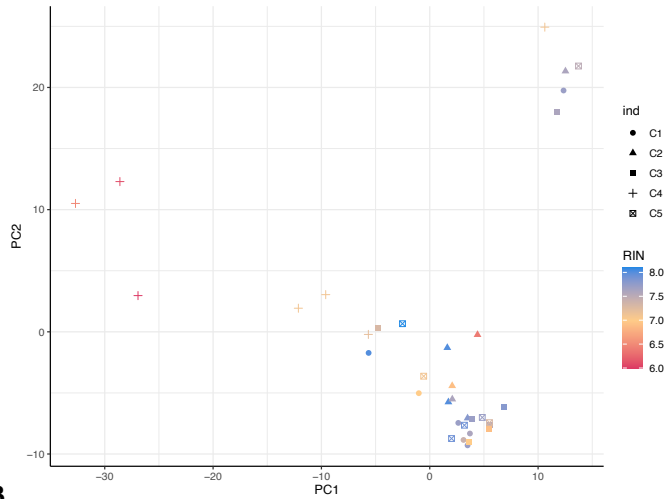

1069 **B**

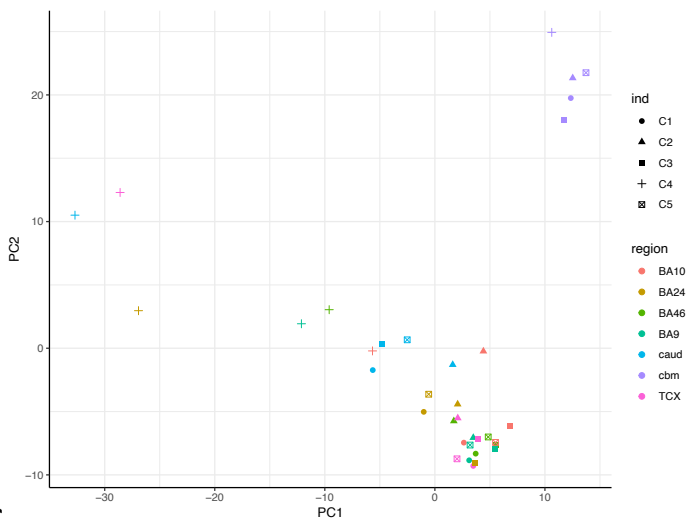

1070 **C**

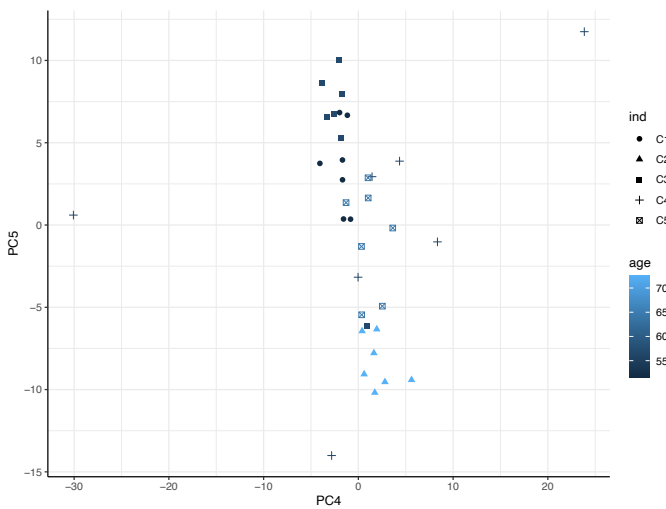

1071

1072 **Supplementary Figure 6. Long-read amplicon mapping accuracy. A.** All sequenced risk genes.  
 1073 Plotted range 0.85 – 1.00. **B.** A box and whiskers plot of the median accuracy for each risk gene.  
 1074 Open circles indicate the library was prepared with ligation sequencing kit 110 (ONT). Colours  
 1075 indicate flow cells that were used multiple times (N=3-5).

1076 **A**

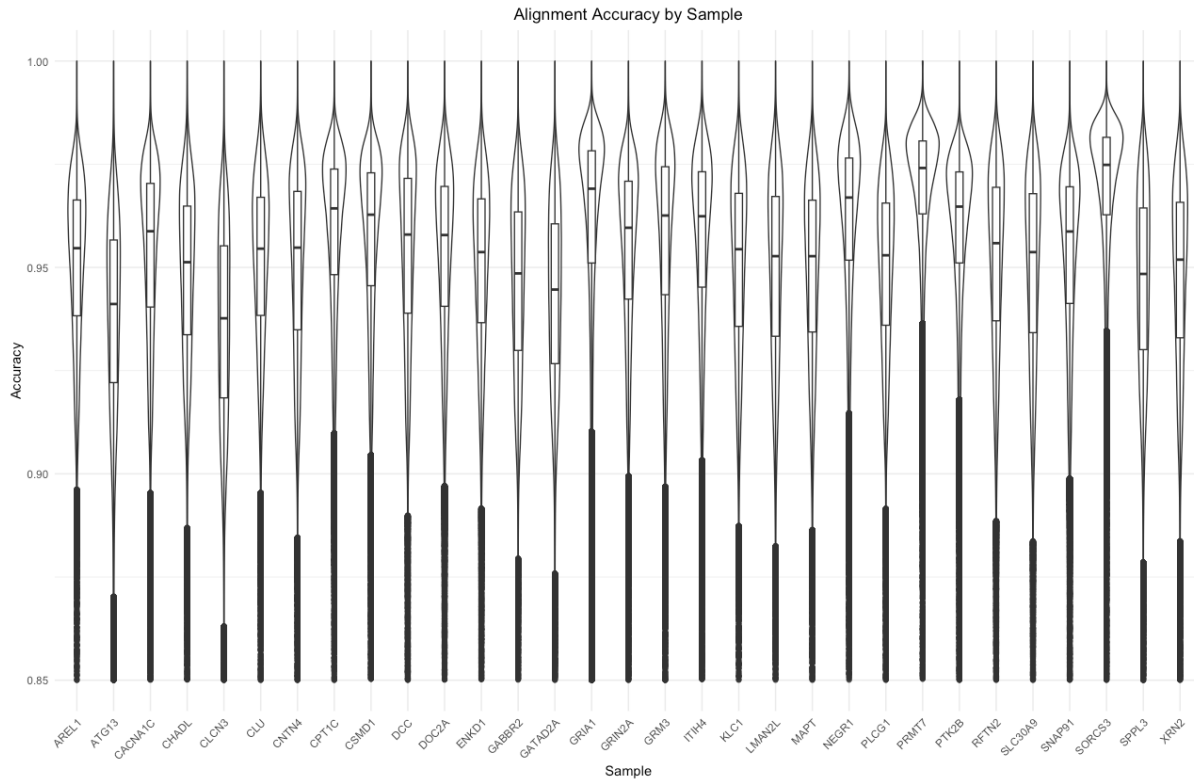

1077

1078 **B**

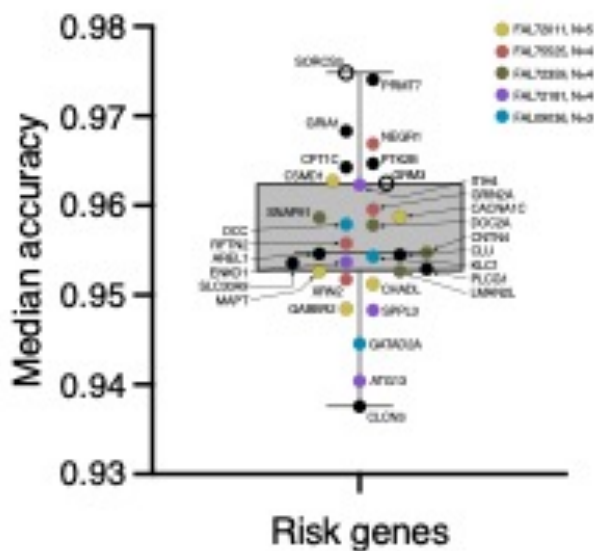

1079

1080 **Supplementary Figure 7. Risk gene isoform counts.** The number of detected isoforms (known and  
 1081 novel) is shown for each risk gene sorted from lowest (*GRIN2A*) to highest (*ITIH4*). Each isoform was  
 1082 classified into a SQANTI subcategory: reference match (RM), containing at least one novel splice site  
 1083 (ALO), retained intron (RI), combination of known junctions (COJ) or splice sites (COS). Known  
 1084 (RM) isoform counts are plotted on the right Y-axis and novel isoform counts are plotted on the left  
 1085 Y-axis.

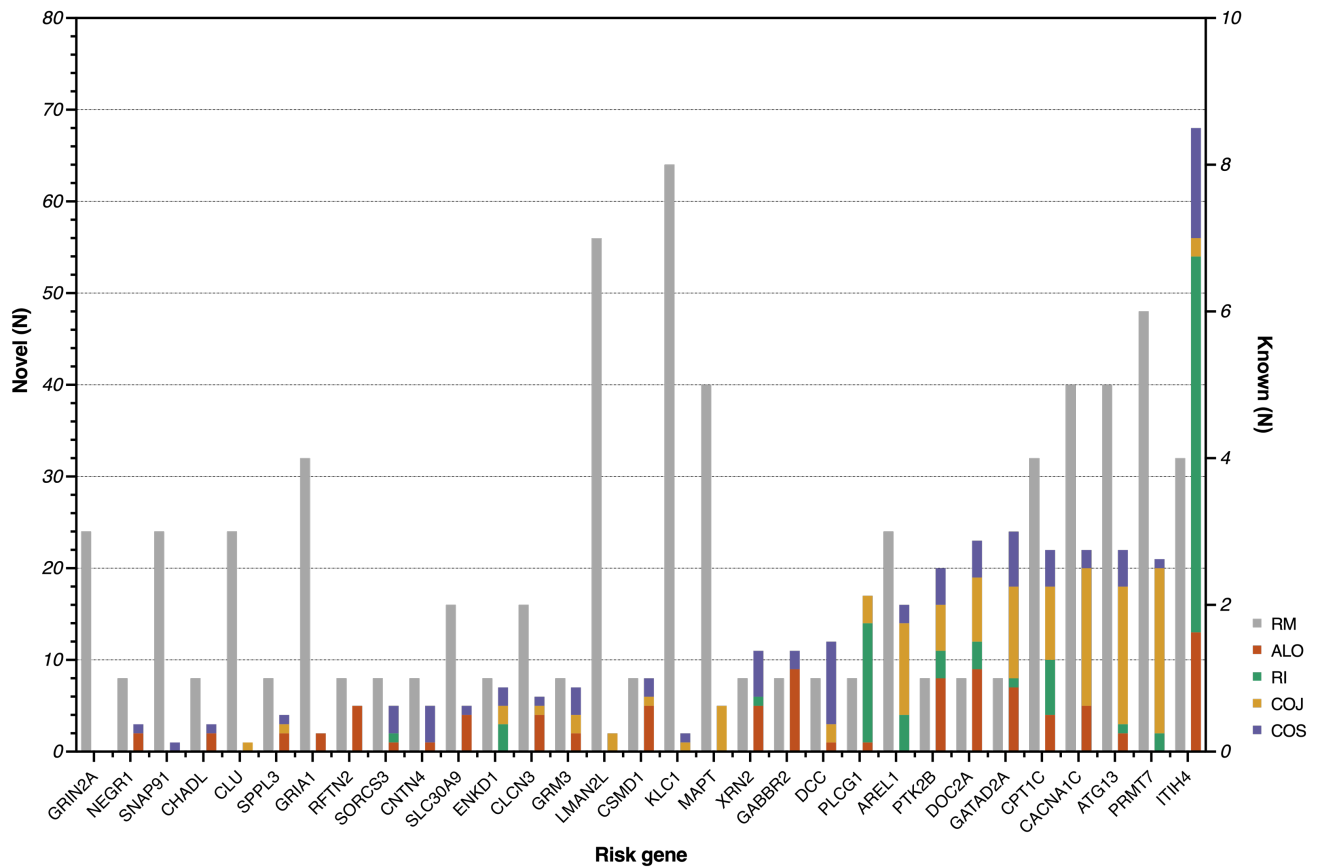

1086

1087

1088 **Supplementary Figure 8. Linear regression of amplicon length or canonical exon count against**  
1089 **isoform count and novel isoform TPM proportion does not deviate significantly from zero.**

1090 Linear regression of known and novel isoform counts with expected canonical amplicon length (A)  
1091 and number of canonical exons (B). Linear regression of novel isoform read proportion with expected  
1092 canonical amplicon length (C) and number of canonical exons (D).

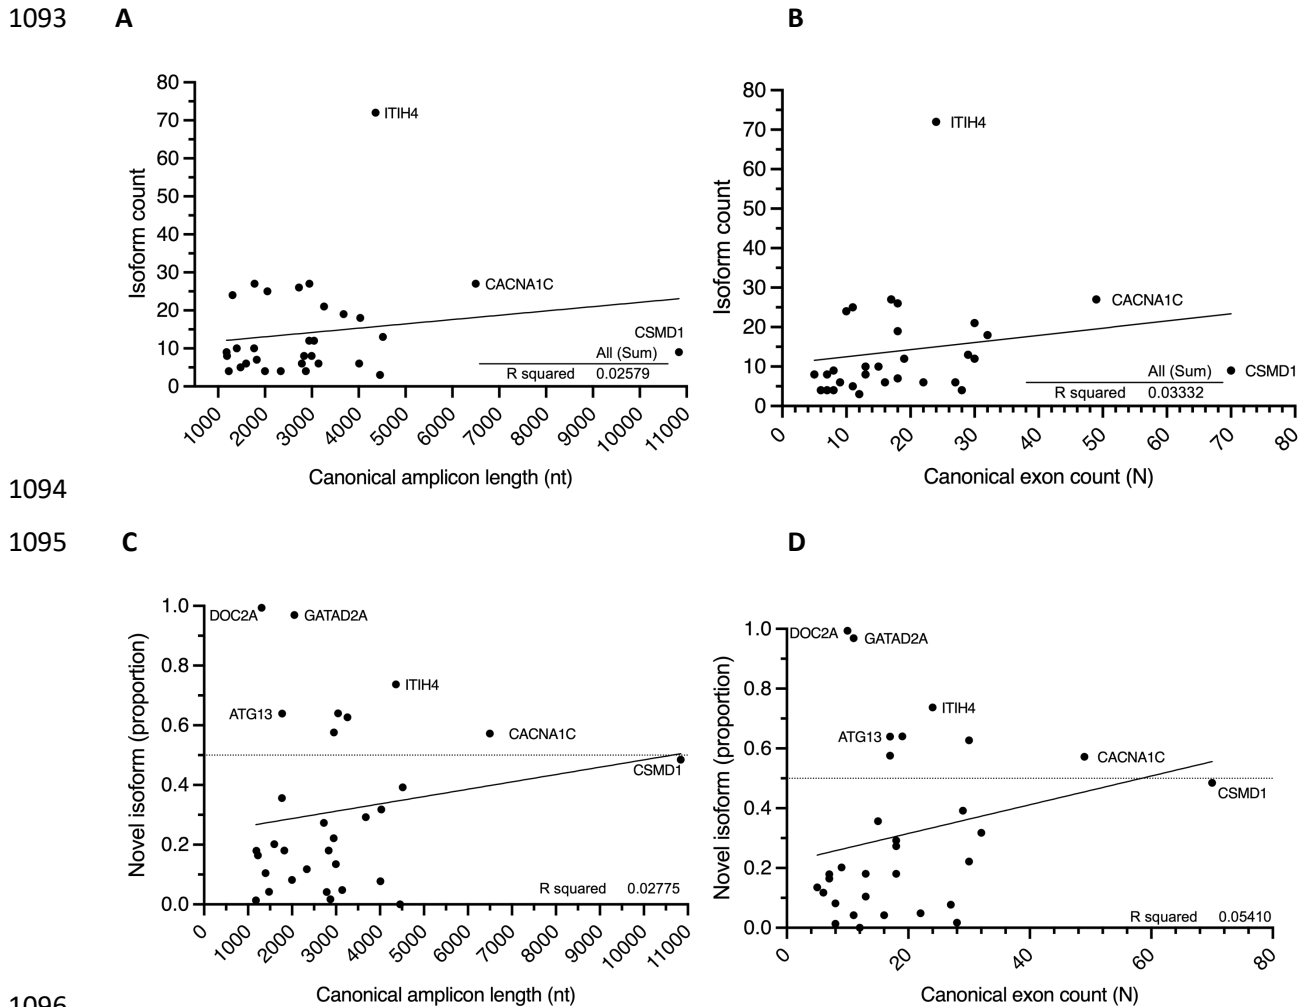



1098 **Supplementary Figure 9. A.** Count of novel isoform splice pairing. Isoforms classified as containing  
1099 at least one novel splice site (ALO) were examined and the novel pair or donor/acceptor was counted.

1100 **A**

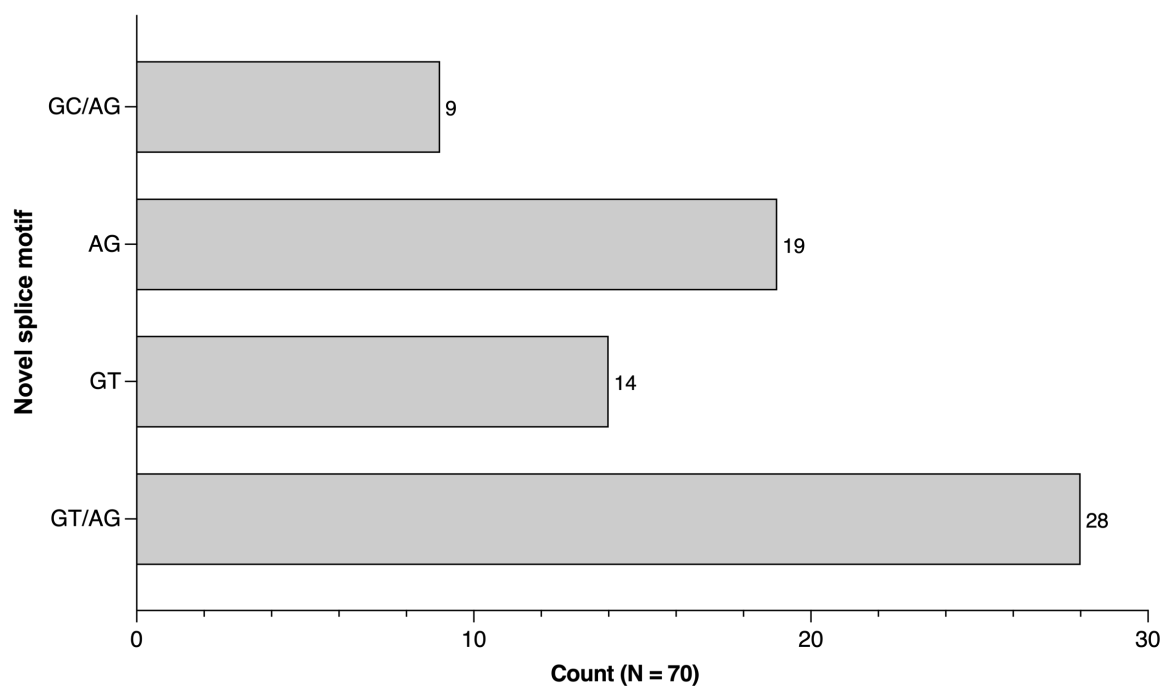

1101

1102

1103 **Supplementary Figure 10. UCSC screenshot of *CACNA1C* splicing hotspot.** Long-read  
 1104 sequencing identified 10 novel isoforms (black tracks) that support one of two annotated alternative  
 1105 splicing events (yellow boxes) within a 12 nt region (chr12:2,493,190-2,493,201) of exon 7 in  
 1106 *CACNA1C*. 11 novel isoforms also supported the use of the canonical (ENST00000399655.6)  
 1107 acceptor site (green box).

1108

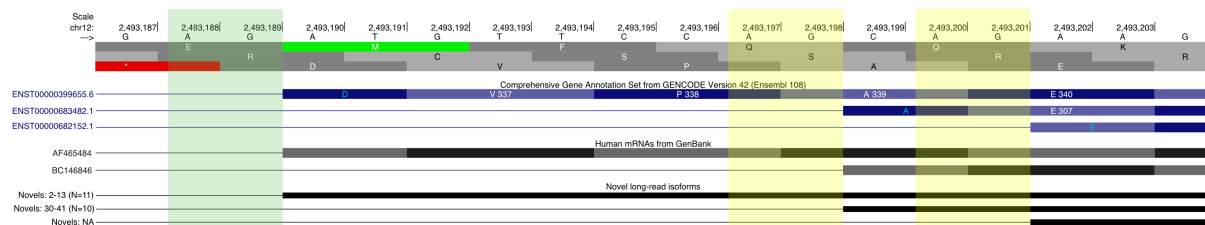

1109

1110

1111 **Supplementary Figure 11. *NEGR1* splice isoforms and protein prediction. A.** The IsoVis  
 1112 schematic of *NEGR1* known and novel isoforms. Protein track indicates 5' signal peptide (brown)  
 1113 and three immunoglobulin (Ig)-like domains (red). **B.** *NEGR1* pre-mRNA splice graph and predicted  
 1114 mRNA outcome. **C.** *NEGR1* novel exons were validated using Sanger sequencing of PCR amplicons  
 1115 and sequence reads were aligned and viewed using UCSC Genome Browser. Orange boxes indicate  
 1116 the novel exons and highlight high vertebrate conservation for exon 6a and predicted (NCBI RefSeq)  
 1117 termination site for exon 6a. **D.** AlphaFold protein prediction of the canonical *NEGR1* isoform  
 1118 (ENST00000357731). Three Ig-like domains are coloured according to the reported amino-acid  
 1119 positions (UniProt: Q7Z3B1); 1 (orange), 2 (blue) and 3 (pink). A GPI anchor residue (red)  
 1120 is shown at position 324 aa (C-terminal, red arrow). **E.** Overlaid AlphaFold protein predictions of novel Tx1  
 1121 (purple) and Tx2 (orange). Ig-like domains are numbered 1-3, the GPI anchor (red) is present in Tx1  
 1122 and the termination of Tx is indicated by a red arrow. Novel residues (pink) are indicated at the C-  
 1123 terminal end for both transcripts, Tx1: 14 aa and Tx2: 7 aa.

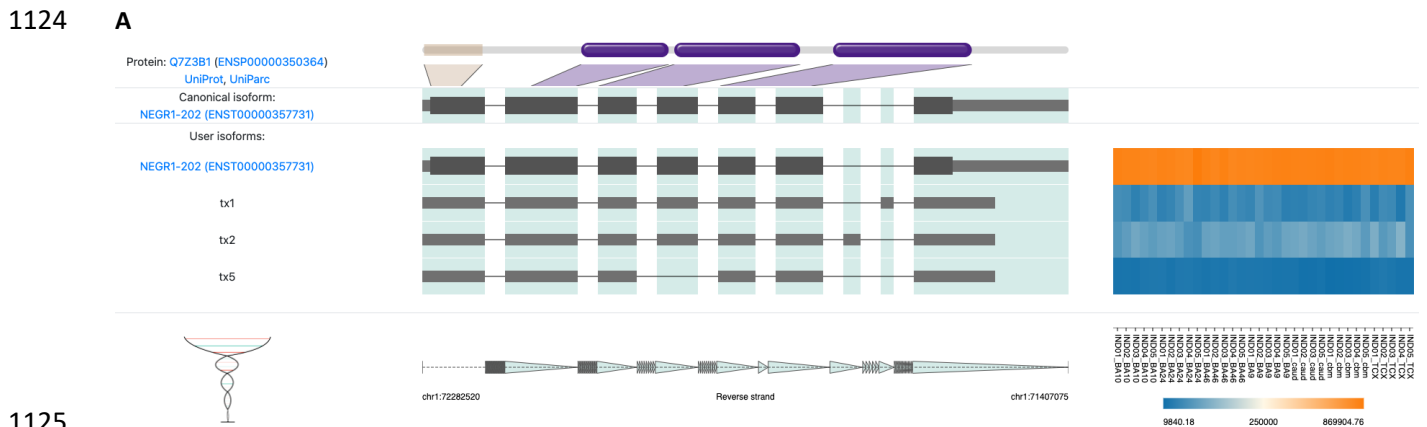

1125

1126

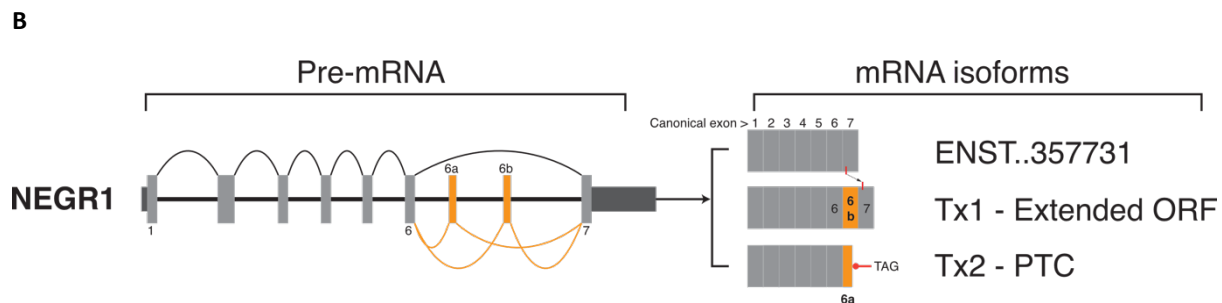

1127

1128

1129

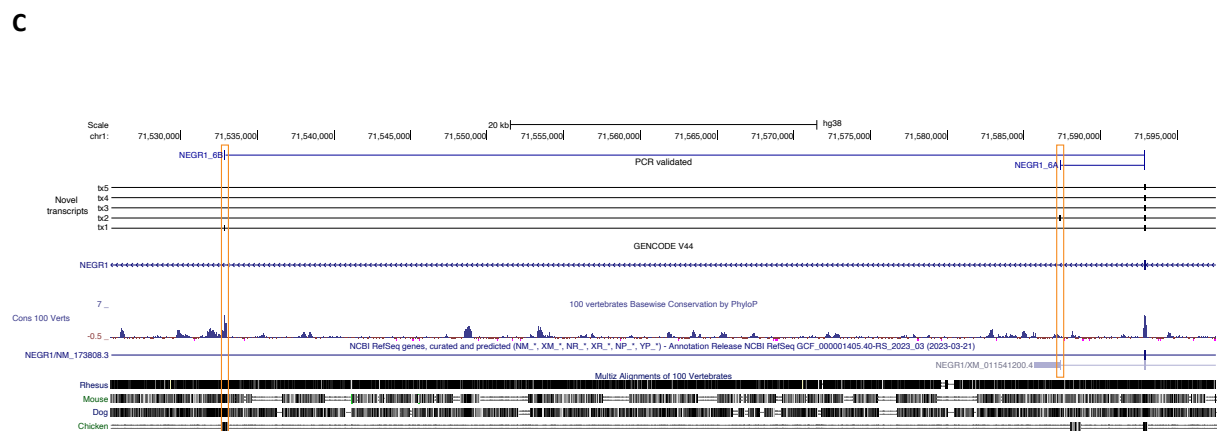

1130

1131

1132

1133 **D**

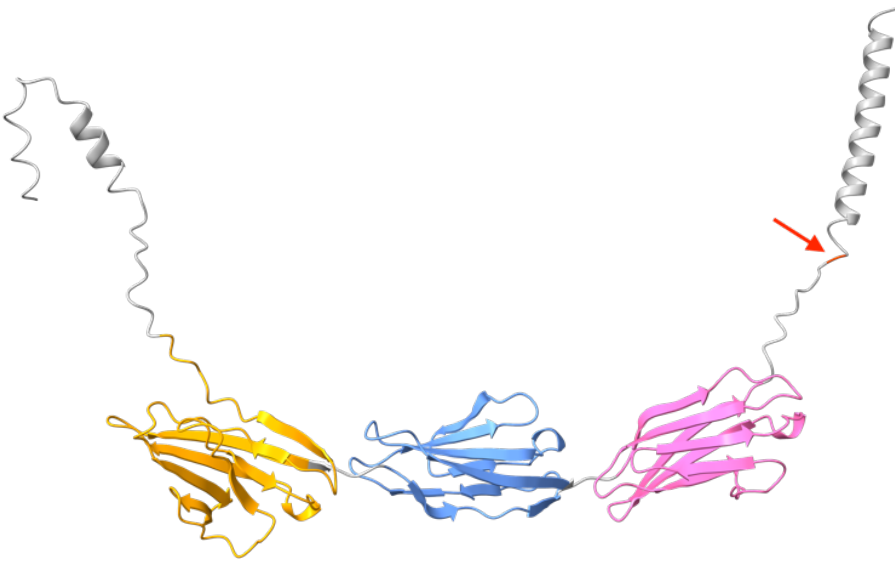

1134

1135 **E**

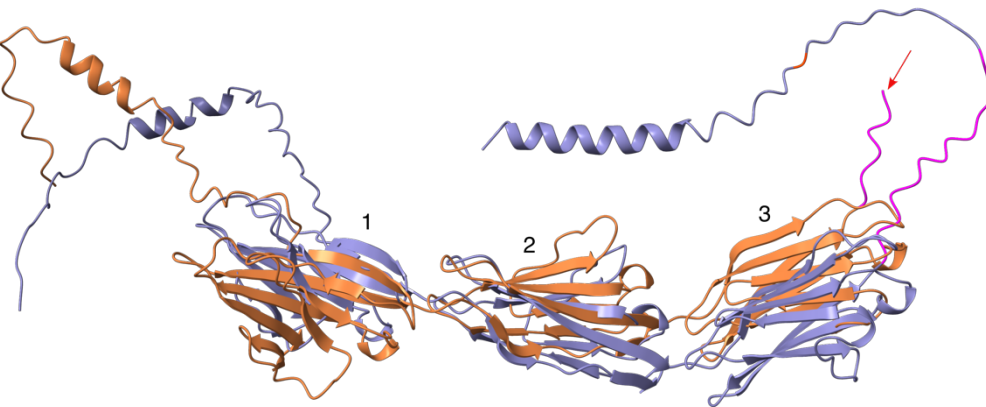

1136

1137

1138 **Supplementary Figure 12A. Novel exon validation in *CLCN3*.** Novel exon 2a in the schizophrenia  
 1139 risk gene *CLCN3*, identified in long-read sequencing data, was validated by PCR using primers  
 1140 designed in the flanking cassette exons 1 and 3 (ENST00000513761). The novel exon sequence  
 1141 shown in novel transcript (Tx) 2 was validated with Sanger sequencing from the 5' canonical exon 2  
 1142 (C2F1) to the reverse primer within the novel sequence (N2aR1) and from the novel sequence  
 1143 (N2aF1) to the 3' canonical exon 3 (C3R1). Direction of reads are indicated with arrows. Black and  
 1144 orange boxes indicate forward and reverse Sanger sequence respectively. Blue boxes indicate forward  
 1145 and reverse primers within the novel exon. A known cytoplasmic domain is shown by an orange  
 1146 track. Key: expressed sequence tag (EST). **B. Novel exon categories.** The impact of novel exon  
 1147 inclusion on the open reading frame of novel isoforms was predicted using Expsy [55] and then  
 1148 classed into groups, predicted to retain the open reading frame (ORF), inclusion of premature  
 1149 termination codon or 'poison exon' that was predicted to lead to nonsense-mediated decay (PE:NMD)  
 1150 or was <50 nt from the final exon junction (PE: <50 nt) or was with the 5' or 3' untranslated regions  
 1151 (UTR).

1152 **A**

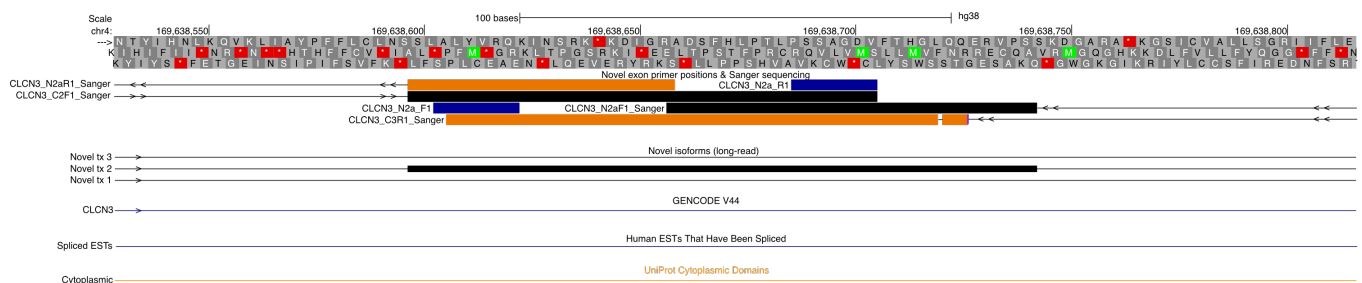

1153

1154 **B**

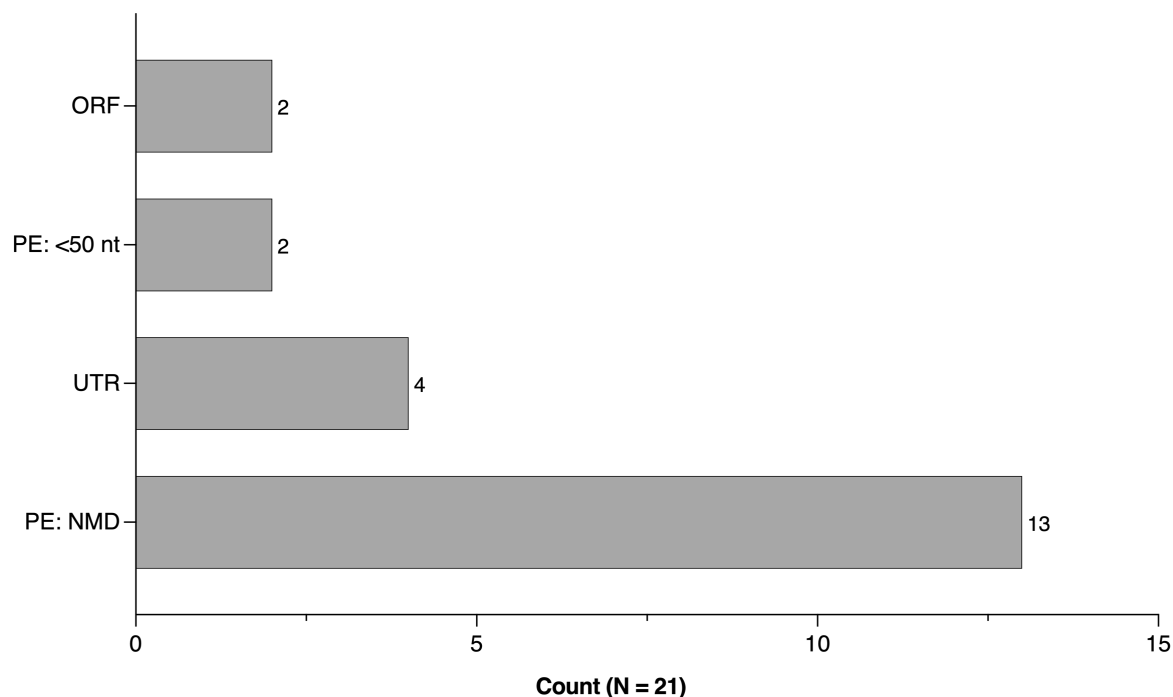

1155



1156 **Supplementary Figure 13. Splice graph of *XRN2* novel isoforms containing novel exons.** Dark  
1157 and light grey boxes indicate 5' and 3' UTR and coding exons respectively. Orange lines and boxes  
1158 indicate novel splicing events and exons. Novel transcript 1 (Tx1) contains a novel splice acceptor  
1159 (AG) within exon 14 (+24 nt) leading to a premature termination codon (PTC) and predicted nonsense  
1160 mediated decay. Novel transcript 2 (Tx2) includes the validated novel exon 16a (54 nt) which was  
1161 also predicted to encode a PTC. Novel isoform 3 (Tx3) contains a validated novel exon (29a) which  
1162 encodes a PTC <50 nt from the final exon junction. Tx3 was predicted to lead to a truncated protein  
1163 (934 aa). “..” indicates 0’s removed for brevity.

1164

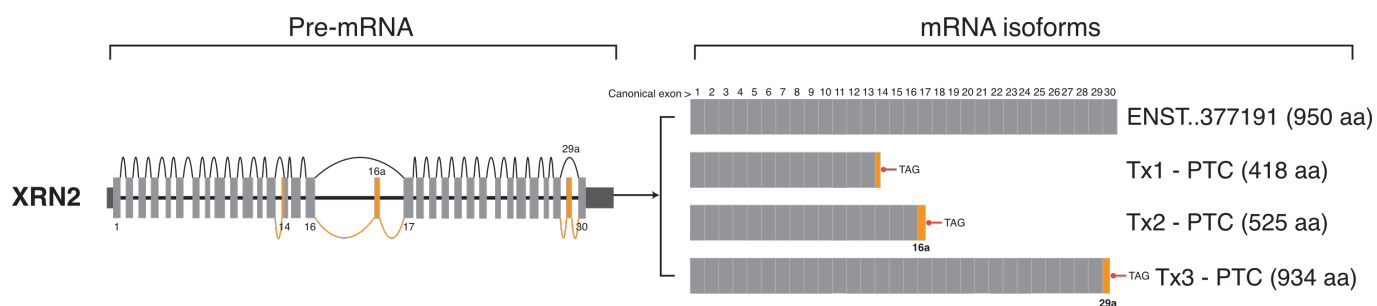

1165
